# Supplementary material for: Peripheral Blood Cells from Patients with Hodgkin’s and Diffuse Large B Cell Lymphomas May Be a Better Source of Candidate Diagnostic miRNAs Than Circulating miRNAs
Source: Hindawi journal article supplement (doi:10.1155/2021/3212878), 2021-01-01

Supplementary Table S1. The results of differential expression test performed with edgeR for c-miRNAs, where logFC - fold-change logarithm, LR - likelihood ratio statistic, Pvalue - p-value in likelihood ratio test, Qvalue - p-value after FDR correction, AUC - area under ROC curve.

|                   | logFC    | LR       | PValue   | QValue   | AUC      | Comparison |
|-------------------|----------|----------|----------|----------|----------|------------|
| hsa-miR-206       | -2.71197 | 11.11952 | 0.000854 | 0.02464  | 0.675    | HL_1       |
| hsa-miR-203       | -1.6835  | 11.32809 | 0.000763 | 0.02464  | 0.728333 | HL_1       |
| hsa-miR-495       | -1.55229 | 11.74804 | 0.000609 | 0.021883 | 0.69     | HL_1       |
| hsa-miR-340-3p    | -1.26816 | 10.14823 | 0.001444 | 0.033024 | 0.734167 | HL_1       |
| hsa-miR-150-5p    | -1.17665 | 13.27714 | 0.000269 | 0.012566 | 0.776667 | HL_1       |
| hsa-miR-126-3p    | -0.9524  | 13.97908 | 0.000185 | 0.012537 | 0.743333 | HL_1       |
| hsa-miR-151a-5p   | -0.86972 | 16.33327 | 5.31E-05 | 0.007738 | 0.776667 | HL_1       |
| hsa-miR-101-3p    | -0.85054 | 11.62034 | 0.000652 | 0.022561 | 0.66     | HL_1       |
| hsa-miR-151b      | -0.84688 | 16.46462 | 4.96E-05 | 0.007738 | 0.775    | HL_1       |
| hsa-miR-7-1-3p    | 1.000564 | 10.7222  | 0.001059 | 0.026268 | 0.688333 | HL_1       |
| hsa-let-7d-3p     | 1.0217   | 13.94475 | 0.000188 | 0.012537 | 0.708333 | HL_1       |
| hsa-miR-629-5p    | 1.066126 | 13.69942 | 0.000215 | 0.012566 | 0.75     | HL_1       |
| hsa-miR-320b      | 1.079829 | 11.85805 | 0.000574 | 0.021392 | 0.725    | HL_1       |
| hsa-miR-532-3p    | 1.089236 | 10.72746 | 0.001056 | 0.026268 | 0.713333 | HL_1       |
| hsa-miR-582-5p    | 1.105949 | 14.19475 | 0.000165 | 0.012537 | 0.7975   | HL_1       |
| hsa-miR-338-5p    | 1.126176 | 13.83679 | 0.000199 | 0.012537 | 0.721667 | HL_1       |
| hsa-miR-378a-5p   | 1.189778 | 11.56291 | 0.000673 | 0.022561 | 0.746667 | HL_1       |
| hsa-miR-501-3p    | 1.197115 | 15.43435 | 8.54E-05 | 0.008682 | 0.751667 | HL_1       |
| hsa-miR-345-5p    | 1.200155 | 12.1888  | 0.000481 | 0.018695 | 0.770833 | HL_1       |
| hsa-miR-551a      | 1.281416 | 10.83112 | 0.000998 | 0.026268 | 0.713333 | HL_1       |
| hsa-miR-205-5p    | 1.294768 | 9.580304 | 0.001967 | 0.043012 | 0.49     | HL_1       |
| hsa-miR-193a-5p   | 1.349899 | 16.30778 | 5.38E-05 | 0.007738 | 0.691667 | HL_1       |
| hsa-miR-320c      | 1.409628 | 12.66379 | 0.000373 | 0.016306 | 0.74     | HL_1       |
| hsa-miR-320d      | 1.428306 | 9.420637 | 0.002146 | 0.045924 | 0.7175   | HL_1       |
| hsa-miR-642a-5p   | 1.434538 | 11.06077 | 0.000882 | 0.02464  | 0.633333 | HL_1       |
| hsa-miR-4454      | 1.437169 | 10.70134 | 0.001071 | 0.026268 | 0.614167 | HL_1       |
| hsa-miR-4772-5p   | 1.478009 | 9.87358  | 0.001677 | 0.037483 | 0.78     | HL_1       |
| hsa-miR-877-5p    | 1.569449 | 13.54485 | 0.000233 | 0.012566 | 0.5875   | HL_1       |
| hsa-miR-365a-3p   | 1.673313 | 11.19401 | 0.000821 | 0.02464  | 0.725    | HL_1       |
| hsa-miR-365b-3p   | 1.673319 | 11.19683 | 0.000819 | 0.02464  | 0.725    | HL_1       |
| hsa-miR-188-5p    | 1.678609 | 12.24039 | 0.000468 | 0.018695 | 0.7375   | HL_1       |
| hsa-miR-4466      | 2.087595 | 10.32799 | 0.00131  | 0.031384 | 0.690833 | HL_1       |
| hsa-miR-3940-5p   | 2.105771 | 10.18007 | 0.00142  | 0.033024 | 0.6      | HL_1       |
| hsa-miR-29b-1-5p  | 2.148588 | 13.25512 | 0.000272 | 0.012566 | 0.620833 | HL_1       |
| hsa-miR-27a-5p    | 2.157147 | 14.11593 | 0.000172 | 0.012537 | 0.658333 | HL_1       |
| hsa-miR-9-3p      | 2.237655 | 18.45611 | 1.74E-05 | 0.00583  | 0.73     | HL_1       |
| hsa-miR-34c-5p    | 2.289491 | 12.17947 | 0.000483 | 0.018695 | 0.641667 | HL_1       |
| hsa-miR-34c-3p    | 2.60852  | 11.09013 | 0.000868 | 0.02464  | 0.6      | HL_1       |
| hsa-miR-618       | 2.6433   | 18.98077 | 1.32E-05 | 0.00583  | 0.773333 | HL_1       |
| hsa-miR-4792      | 2.752415 | 10.94553 | 0.000938 | 0.025511 | 0.665833 | HL_1       |
| hsa-miR-4772-3p   | 3.046634 | 13.3089  | 0.000264 | 0.012566 | 0.583333 | HL_1       |
| hsa-miR-1285-5p   | 3.119654 | 17.42083 | 3E-05    | 0.007533 | 0.615833 | HL_1       |
| hsa-miR-211-5p    | 3.130707 | 13.9061  | 0.000192 | 0.012537 | 0.6625   | HL_1       |
| hsa-miR-129-2-3p  | 3.4885   | 13.23473 | 0.000275 | 0.012566 | 0.57     | HL_1       |
| hsa-miR-4492      | 3.991991 | 15.85725 | 6.83E-05 | 0.008589 | 0.626667 | HL_1       |
| hsa-miR-129-5p    | 6.061504 | 32.19346 | 1.4E-08  | 1.4E-05  | 0.7      | HL_1       |
| hsa-miR-3676-5p   | 6.15019  | 15.41496 | 8.63E-05 | 0.008682 | 0.560833 | HL_1       |
| hsa-miR-369-3p    | -2.65491 | 27.88598 | 1.29E-07 | 0.00013  | 0.831746 | DLBCL_1    |
| hsa-miR-154-3p    | -2.08184 | 13.33731 | 0.00026  | 0.010553 | 0.715873 | DLBCL_1    |
| hsa-miR-411-3p    | -1.87805 | 9.835236 | 0.001712 | 0.037739 | 0.748413 | DLBCL_1    |
| hsa-miR-376a-5p   | -1.82038 | 10.08605 | 0.001494 | 0.03523  | 0.81746  | DLBCL_1    |
| hsa-miR-495       | -1.72944 | 15.64053 | 7.66E-05 | 0.004996 | 0.72381  | DLBCL_1    |
| hsa-miR-190b      | -1.72056 | 10.73685 | 0.00105  | 0.025974 | 0.795238 | DLBCL_1    |
| hsa-miR-136-3p    | -1.70448 | 12.11842 | 0.000499 | 0.015413 | 0.810317 | DLBCL_1    |
| hsa-miR-24-2-5p   | -1.63048 | 15.95539 | 6.49E-05 | 0.004996 | 0.738095 | DLBCL_1    |
| hsa-miR-487b      | -1.57673 | 11.81205 | 0.000588 | 0.017049 | 0.69127  | DLBCL_1    |
| hsa-miR-382-3p    | -1.56595 | 9.56379  | 0.001985 | 0.041923 | 0.696825 | DLBCL_1    |
| hsa-miR-1185-1-3p | -1.5451  | 9.430629 | 0.002134 | 0.044159 | 0.694444 | DLBCL_1    |
| hsa-miR-379-5p    | -1.46997 | 9.202045 | 0.002417 | 0.047531 | 0.753968 | DLBCL_1    |
| hsa-miR-1         | -1.11766 | 9.117857 | 0.002531 | 0.047531 | 0.706349 | DLBCL_1    |
| hsa-miR-190a      | -1.09093 | 14.52384 | 0.000138 | 0.006683 | 0.771429 | DLBCL_1    |
| hsa-miR-101-3p    | -1.00875 | 15.51975 | 8.16E-05 | 0.004996 | 0.719048 | DLBCL_1    |
| hsa-miR-301a-3p   | -0.96548 | 12.87554 | 0.000333 | 0.011356 | 0.774603 | DLBCL_1    |
| hsa-miR-126-3p    | -0.94526 | 14.84689 | 0.000117 | 0.006223 | 0.750794 | DLBCL_1    |
| hsa-miR-144-5p    | -0.88972 | 17.61916 | 2.7E-05  | 0.003909 | 0.844444 | DLBCL_1    |
| hsa-miR-151a-5p   | -0.81594 | 13.90784 | 0.000192 | 0.008781 | 0.784127 | DLBCL_1    |

|                   |          |          |          |          |          |         |
|-------------------|----------|----------|----------|----------|----------|---------|
| hsa-miR-151b      | -0.7903  | 13.83888 | 0.000199 | 0.008781 | 0.784127 | DLBCL_1 |
| hsa-miR-501-3p    | 0.906744 | 11.63682 | 0.000647 | 0.018107 | 0.807937 | DLBCL_1 |
| hsa-miR-629-5p    | 0.925223 | 10.40532 | 0.001257 | 0.030336 | 0.744444 | DLBCL_1 |
| hsa-miR-486-3p    | 1.042922 | 9.594772 | 0.001951 | 0.041923 | 0.612698 | DLBCL_1 |
| hsa-miR-210       | 1.050823 | 11.24269 | 0.000799 | 0.020784 | 0.585714 | DLBCL_1 |
| hsa-miR-193a-5p   | 1.123015 | 13.00558 | 0.000311 | 0.011247 | 0.734921 | DLBCL_1 |
| hsa-miR-345-5p    | 1.194738 | 12.85828 | 0.000336 | 0.011356 | 0.707143 | DLBCL_1 |
| hsa-miR-378a-5p   | 1.220004 | 11.46904 | 0.000708 | 0.018883 | 0.669841 | DLBCL_1 |
| hsa-miR-4772-5p   | 1.39867  | 9.141816 | 0.002498 | 0.047531 | 0.731746 | DLBCL_1 |
| hsa-miR-188-5p    | 1.465009 | 10.02363 | 0.001545 | 0.035616 | 0.681746 | DLBCL_1 |
| hsa-miR-193b-3p   | 1.48585  | 13.11549 | 0.000293 | 0.011247 | 0.698413 | DLBCL_1 |
| hsa-miR-34a-5p    | 1.520942 | 16.89212 | 3.96E-05 | 0.004996 | 0.74127  | DLBCL_1 |
| hsa-miR-1537      | 1.57856  | 12.5411  | 0.000398 | 0.013022 | 0.595238 | DLBCL_1 |
| hsa-miR-629-3p    | 1.832047 | 9.931775 | 0.001624 | 0.036605 | 0.553968 | DLBCL_1 |
| hsa-miR-365a-3p   | 1.843087 | 15.51973 | 8.16E-05 | 0.004996 | 0.742857 | DLBCL_1 |
| hsa-miR-365b-3p   | 1.843097 | 15.52303 | 8.15E-05 | 0.004996 | 0.742857 | DLBCL_1 |
| hsa-miR-3960      | 1.872197 | 9.185297 | 0.00244  | 0.047531 | 0.647619 | DLBCL_1 |
| hsa-miR-500a-5p   | 1.89817  | 11.93477 | 0.000551 | 0.016432 | 0.6      | DLBCL_1 |
| hsa-miR-500b      | 1.949633 | 11.59665 | 0.000661 | 0.018107 | 0.571429 | DLBCL_1 |
| hsa-miR-3192      | 1.958722 | 10.80862 | 0.00101  | 0.025611 | 0.595238 | DLBCL_1 |
| hsa-miR-1228-5p   | 2.081105 | 15.66145 | 7.58E-05 | 0.004996 | 0.721429 | DLBCL_1 |
| hsa-miR-4792      | 2.170316 | 13.02126 | 0.000308 | 0.011247 | 0.65873  | DLBCL_1 |
| hsa-miR-3150b-5p  | 2.22676  | 13.4573  | 0.000244 | 0.010311 | 0.619048 | DLBCL_1 |
| hsa-miR-1246      | 2.240011 | 15.1625  | 9.86E-05 | 0.005557 | 0.787302 | DLBCL_1 |
| hsa-miR-9-3p      | 2.331778 | 15.75205 | 7.22E-05 | 0.004996 | 0.631746 | DLBCL_1 |
| hsa-miR-4707-3p   | 2.408312 | 9.335077 | 0.002248 | 0.045591 | 0.680952 | DLBCL_1 |
| hsa-miR-34a-3p    | 2.416727 | 14.68409 | 0.000127 | 0.006445 | 0.652381 | DLBCL_1 |
| hsa-miR-4466      | 2.519845 | 12.10967 | 0.000502 | 0.015413 | 0.698413 | DLBCL_1 |
| hsa-miR-1273f     | 2.964669 | 19.27486 | 1.13E-05 | 0.003626 | 0.698825 | DLBCL_1 |
| hsa-miR-1290      | 3.199961 | 23.4702  | 1.27E-06 | 0.000643 | 0.68254  | DLBCL_1 |
| hsa-miR-4492      | 3.322191 | 15.55279 | 8.02E-05 | 0.004996 | 0.622222 | DLBCL_1 |
| hsa-miR-4488      | 3.591049 | 15.47156 | 8.38E-05 | 0.004996 | 0.649206 | DLBCL_1 |
| hsa-miR-129-5p    | 3.849677 | 9.056657 | 0.002617 | 0.048255 | 0.590476 | DLBCL_1 |
| hsa-miR-3689e     | 5.121043 | 18.06908 | 2.13E-05 | 0.003626 | 0.595238 | DLBCL_1 |
| hsa-miR-3689b-5p  | 5.121145 | 18.05596 | 2.15E-05 | 0.003626 | 0.595238 | DLBCL_1 |
| hsa-miR-3689a-5p  | 5.12115  | 18.05532 | 2.15E-05 | 0.003626 | 0.595238 | DLBCL_1 |
| hsa-miR-1185-2-3p | -3.29402 | 11.46257 | 0.00071  | 0.019666 | 0.3      | HL_3    |
| hsa-miR-369-5p    | -2.90643 | 17.4448  | 2.96E-05 | 0.001698 | 0.844444 | HL_3    |
| hsa-miR-431-3p    | -2.75474 | 11.05397 | 0.000885 | 0.022046 | 0.773148 | HL_3    |
| hsa-miR-382-3p    | -2.15211 | 13.02927 | 0.000307 | 0.009671 | 0.798148 | HL_3    |
| hsa-miR-495       | -1.99427 | 19.29716 | 1.12E-05 | 0.000797 | 0.753704 | HL_3    |
| hsa-miR-369-3p    | -1.90464 | 14.81745 | 0.000118 | 0.004373 | 0.738889 | HL_3    |
| hsa-miR-487a      | -1.66835 | 9.475067 | 0.002083 | 0.040717 | 0.747222 | HL_3    |
| hsa-miR-431-5p    | -1.57233 | 10.46589 | 0.001216 | 0.026538 | 0.787037 | HL_3    |
| hsa-miR-150-5p    | -1.47001 | 15.90597 | 6.66E-05 | 0.003017 | 0.82963  | HL_3    |
| hsa-miR-487b      | -1.45578 | 8.996701 | 0.002705 | 0.047856 | 0.686111 | HL_3    |
| hsa-miR-323a-3p   | -1.44525 | 8.916244 | 0.002826 | 0.047856 | 0.748148 | HL_3    |
| hsa-miR-494       | -1.29908 | 10.4235  | 0.001244 | 0.026538 | 0.714815 | HL_3    |
| hsa-miR-376c      | -1.09813 | 11.26427 | 0.00079  | 0.020955 | 0.716667 | HL_3    |
| hsa-miR-342-3p    | -1.01322 | 13.00661 | 0.00031  | 0.009671 | 0.792593 | HL_3    |
| hsa-miR-101-3p    | -0.88953 | 11.24426 | 0.000799 | 0.020955 | 0.677778 | HL_3    |
| hsa-miR-301a-3p   | -0.87394 | 8.995989 | 0.002706 | 0.047856 | 0.775926 | HL_3    |
| hsa-miR-660-5p    | 0.661315 | 9.607722 | 0.001938 | 0.038636 | 0.788889 | HL_3    |
| hsa-miR-500a-3p   | 0.830911 | 11.0168  | 0.000903 | 0.022046 | 0.757407 | HL_3    |
| hsa-miR-532-3p    | 0.966186 | 9.056379 | 0.002618 | 0.047856 | 0.714815 | HL_3    |
| hsa-miR-99a-5p    | 1.014468 | 8.881988 | 0.00288  | 0.047856 | 0.611111 | HL_3    |
| hsa-miR-324-3p    | 1.023743 | 11.0092  | 0.000907 | 0.022046 | 0.742593 | HL_3    |
| hsa-miR-501-3p    | 1.026316 | 12.24918 | 0.000465 | 0.013649 | 0.792593 | HL_3    |
| hsa-miR-30a-5p    | 1.044317 | 15.55641 | 8.01E-05 | 0.003434 | 0.709259 | HL_3    |
| hsa-miR-7-1-3p    | 1.088989 | 10.57667 | 0.001145 | 0.026025 | 0.716667 | HL_3    |
| hsa-miR-100-5p    | 1.12333  | 13.2983  | 0.000266 | 0.008828 | 0.590741 | HL_3    |
| hsa-miR-1307-3p   | 1.260383 | 13.63977 | 0.000221 | 0.007613 | 0.635185 | HL_3    |
| hsa-miR-483-3p    | 1.262122 | 15.12154 | 0.000101 | 0.003866 | 0.77037  | HL_3    |
| hsa-miR-186-5p    | 1.289897 | 19.86341 | 8.32E-06 | 0.000668 | 0.709259 | HL_3    |
| hsa-miR-378i      | 1.30301  | 12.5898  | 0.000388 | 0.011718 | 0.646296 | HL_3    |
| hsa-miR-339-5p    | 1.330011 | 16.62875 | 4.55E-05 | 0.002266 | 0.590741 | HL_3    |
| hsa-miR-1537      | 1.410118 | 9.045928 | 0.002633 | 0.047856 | 0.639815 | HL_3    |
| hsa-miR-629-5p    | 1.429505 | 19.77539 | 8.71E-06 | 0.000668 | 0.775926 | HL_3    |
| hsa-miR-345-5p    | 1.477316 | 17.45207 | 2.95E-05 | 0.001698 | 0.783333 | HL_3    |
| hsa-miR-769-3p    | 1.498893 | 10.15035 | 0.001443 | 0.029967 | 0.611111 | HL_3    |

|                 |          |          |          |          |          |         |
|-----------------|----------|----------|----------|----------|----------|---------|
| hsa-miR-378a-5p | 1.502374 | 17.11609 | 3.52E-05 | 0.001845 | 0.774074 | HL_3    |
| hsa-miR-627     | 1.624606 | 15.199   | 9.68E-05 | 0.003859 | 0.685185 | HL_3    |
| hsa-miR-4454    | 1.666269 | 13.93497 | 0.000189 | 0.006738 | 0.575    | HL_3    |
| hsa-miR-378a-3p | 1.688206 | 23.29698 | 1.39E-06 | 0.000126 | 0.67037  | HL_3    |
| hsa-miR-378c    | 1.688325 | 15.49618 | 8.27E-05 | 0.003434 | 0.612963 | HL_3    |
| hsa-miR-1228-5p | 1.732162 | 10.63329 | 0.001111 | 0.026025 | 0.702778 | HL_3    |
| hsa-miR-34a-5p  | 1.84237  | 34.169   | 5.05E-09 | 7.2E-07  | 0.924074 | HL_3    |
| hsa-miR-188-5p  | 2.06311  | 15.92204 | 6.6E-05  | 0.003017 | 0.675    | HL_3    |
| hsa-miR-3191-3p | 2.09742  | 10.57131 | 0.001149 | 0.026025 | 0.583333 | HL_3    |
| hsa-miR-769-5p  | 2.150797 | 28.74723 | 8.25E-08 | 9.14E-06 | 0.601852 | HL_3    |
| hsa-miR-642a-3p | 2.158599 | 9.079261 | 0.002585 | 0.047856 | 0.521296 | HL_3    |
| hsa-miR-195-3p  | 2.161739 | 8.943389 | 0.002785 | 0.047856 | 0.598148 | HL_3    |
| hsa-miR-148a-5p | 2.253241 | 12.02444 | 0.000525 | 0.014957 | 0.653704 | HL_3    |
| hsa-miR-940     | 2.328139 | 10.41343 | 0.001251 | 0.026538 | 0.601852 | HL_3    |
| hsa-miR-483-5p  | 2.350307 | 33.80633 | 6.09E-09 | 7.59E-07 | 0.798148 | HL_3    |
| hsa-miR-4999-5p | 2.379443 | 9.619989 | 0.001925 | 0.038636 | 0.62037  | HL_3    |
| hsa-miR-193a-5p | 2.691278 | 41.38045 | 1.25E-10 | 3.12E-08 | 0.766667 | HL_3    |
| hsa-miR-320d    | 2.710559 | 25.79827 | 3.79E-07 | 3.78E-05 | 0.775    | HL_3    |
| hsa-miR-5100    | 2.719006 | 17.37653 | 3.07E-05 | 0.001698 | 0.517593 | HL_3    |
| hsa-miR-1307-5p | 2.785175 | 35.63515 | 2.38E-09 | 3.95E-07 | 0.744444 | HL_3    |
| hsa-miR-320c    | 2.834617 | 38.70656 | 4.93E-10 | 9.82E-08 | 0.853704 | HL_3    |
| hsa-miR-320a    | 2.956527 | 48.47688 | 3.34E-12 | 1.67E-09 | 0.722222 | HL_3    |
| hsa-miR-320b    | 3.176639 | 49.96566 | 1.56E-12 | 1.56E-09 | 0.785185 | HL_3    |
| hsa-miR-147b    | 3.232239 | 8.896792 | 0.002857 | 0.047856 | 0.52037  | HL_3    |
| hsa-miR-34a-3p  | 3.379765 | 42.01063 | 9.08E-11 | 3.02E-08 | 0.773148 | HL_3    |
| hsa-miR-3676-5p | 6.541329 | 18.70307 | 1.53E-05 | 0.001015 | 0.598148 | HL_3    |
| hsa-miR-431-3p  | -3.37331 | 13.0264  | 0.000307 | 0.020127 | 0.8      | DLBCL_3 |
| hsa-miR-3613-3p | -3.02223 | 15.6851  | 7.48E-05 | 0.006685 | 0.782353 | DLBCL_3 |
| hsa-miR-150-5p  | -1.26897 | 11.7768  | 0.0006   | 0.036846 | 0.776471 | DLBCL_3 |
| hsa-miR-101-3p  | -0.96509 | 13.04515 | 0.000304 | 0.020127 | 0.694118 | DLBCL_3 |
| hsa-miR-450b-5p | 1.374899 | 16.86266 | 4.02E-05 | 0.004389 | 0.673529 | DLBCL_3 |
| hsa-miR-483-5p  | 1.440466 | 13.66643 | 0.000218 | 0.016509 | 0.684314 | DLBCL_3 |
| hsa-miR-483-3p  | 1.441225 | 16.02788 | 6.24E-05 | 0.006136 | 0.760784 | DLBCL_3 |
| hsa-miR-885-5p  | 1.724873 | 19.40676 | 1.06E-05 | 0.001483 | 0.813725 | DLBCL_3 |
| hsa-miR-34a-5p  | 1.969824 | 31.07651 | 2.48E-08 | 1.22E-05 | 0.868627 | DLBCL_3 |
| hsa-miR-365a-3p | 2.293767 | 22.91043 | 1.7E-06  | 0.000278 | 0.882353 | DLBCL_3 |
| hsa-miR-365b-3p | 2.293773 | 22.90918 | 1.7E-06  | 0.000278 | 0.882353 | DLBCL_3 |
| hsa-miR-211-5p  | 3.362912 | 17.82317 | 2.42E-05 | 0.002979 | 0.665686 | DLBCL_3 |
| hsa-miR-34a-3p  | 3.566101 | 38.10346 | 6.71E-10 | 6.6E-07  | 0.786275 | DLBCL_3 |
| hsa-miR-517b-3p | 3.652127 | 28.01728 | 1.2E-07  | 2.95E-05 | 0.708824 | DLBCL_3 |
| hsa-miR-517a-3p | 3.652155 | 28.03553 | 1.19E-07 | 2.95E-05 | 0.708824 | DLBCL_3 |
| hsa-miR-3151    | 5.9486   | 14.34724 | 0.000152 | 0.012452 | 0.619608 | DLBCL_3 |

Supplementary Table S2. The results of differential expression test performed with edgeR for wb-miRNAs, where logFC - fold-change logarithm, LR - likelihood ratio test statistic, Pvalue - p-value in likelihood ratio test, Qvalue - p-value after FDR correction, AUC - area under ROC curve.

|                  | logFC | LR    | PValue   | QValue   | AUC  | Comparison |
|------------------|-------|-------|----------|----------|------|------------|
| hsa-miR-1234     | -2.88 | 18.05 | 2.15E-05 | 6.59E-04 | 0.28 | HL_1       |
| hsa-miR-1        | -2.79 | 10.81 | 1.01E-03 | 1.20E-02 | 0.58 | HL_1       |
| hsa-miR-3591-3p  | -2.64 | 15.27 | 9.31E-05 | 2.01E-03 | 0.32 | HL_1       |
| hsa-miR-4722-5p  | -2.63 | 13.60 | 2.27E-04 | 4.20E-03 | 0.32 | HL_1       |
| hsa-miR-1296     | -2.39 | 20.36 | 6.40E-06 | 3.01E-04 | 0.74 | HL_1       |
| hsa-miR-31-3p    | -2.34 | 10.50 | 1.19E-03 | 1.32E-02 | 0.33 | HL_1       |
| hsa-miR-4738-3p  | -2.27 | 10.34 | 1.31E-03 | 1.38E-02 | 0.35 | HL_1       |
| hsa-miR-3187-3p  | -2.26 | 9.47  | 2.09E-03 | 2.03E-02 | 0.36 | HL_1       |
| hsa-miR-92a-3p   | -2.22 | 12.20 | 4.78E-04 | 7.45E-03 | 0.95 | HL_1       |
| hsa-miR-3064-5p  | -2.17 | 12.83 | 3.41E-04 | 5.91E-03 | 0.73 | HL_1       |
| hsa-miR-4655-5p  | -2.15 | 10.35 | 1.29E-03 | 1.38E-02 | 0.33 | HL_1       |
| hsa-miR-197-5p   | -2.12 | 15.29 | 9.21E-05 | 2.01E-03 | 0.73 | HL_1       |
| hsa-miR-4722-3p  | -2.07 | 8.97  | 2.75E-03 | 2.57E-02 | 0.37 | HL_1       |
| hsa-miR-4750     | -2.04 | 11.36 | 7.52E-04 | 1.09E-02 | 0.76 | HL_1       |
| hsa-miR-146b-3p  | -2.04 | 12.30 | 4.52E-04 | 7.36E-03 | 0.74 | HL_1       |
| hsa-miR-3196     | -2.03 | 7.65  | 5.68E-03 | 4.53E-02 | 0.34 | HL_1       |
| hsa-miR-874      | -2.03 | 7.47  | 6.26E-03 | 4.85E-02 | 0.40 | HL_1       |
| hsa-miR-3682-3p  | -1.94 | 9.59  | 1.95E-03 | 1.95E-02 | 0.71 | HL_1       |
| hsa-miR-6741-3p  | -1.87 | 10.33 | 1.31E-03 | 1.38E-02 | 0.65 | HL_1       |
| hsa-miR-548l     | -1.87 | 17.34 | 3.13E-05 | 7.57E-04 | 0.75 | HL_1       |
| hsa-miR-3177-3p  | -1.69 | 19.40 | 1.06E-05 | 4.21E-04 | 0.80 | HL_1       |
| hsa-miR-4659b-3p | -1.58 | 8.53  | 3.49E-03 | 3.16E-02 | 0.70 | HL_1       |
| hsa-miR-4685-3p  | -1.58 | 28.27 | 1.05E-07 | 1.66E-05 | 0.81 | HL_1       |
| hsa-let-7i-3p    | -1.55 | 19.10 | 1.24E-05 | 4.30E-04 | 0.76 | HL_1       |
| hsa-miR-3173-5p  | -1.55 | 14.96 | 1.10E-04 | 2.26E-03 | 0.72 | HL_1       |
| hsa-miR-4742-3p  | -1.53 | 13.38 | 2.54E-04 | 4.59E-03 | 0.76 | HL_1       |
| hsa-miR-1304-5p  | -1.51 | 20.80 | 5.10E-06 | 2.90E-04 | 0.79 | HL_1       |
| hsa-miR-23a-5p   | -1.46 | 9.14  | 2.50E-03 | 2.37E-02 | 0.64 | HL_1       |
| hsa-miR-200b-3p  | -1.46 | 8.49  | 3.58E-03 | 3.20E-02 | 0.69 | HL_1       |
| hsa-miR-1303     | -1.44 | 19.85 | 8.38E-06 | 3.51E-04 | 0.83 | HL_1       |
| hsa-miR-1306-3p  | -1.44 | 20.25 | 6.81E-06 | 3.01E-04 | 0.79 | HL_1       |
| hsa-miR-4448     | -1.39 | 10.77 | 1.03E-03 | 1.21E-02 | 0.73 | HL_1       |
| hsa-miR-122-5p   | -1.33 | 8.06  | 4.51E-03 | 3.90E-02 | 0.68 | HL_1       |
| hsa-miR-4732-3p  | -1.32 | 19.31 | 1.11E-05 | 4.21E-04 | 0.77 | HL_1       |
| hsa-miR-1294     | -1.32 | 24.02 | 9.53E-07 | 7.59E-05 | 0.86 | HL_1       |
| hsa-miR-939      | -1.29 | 12.17 | 4.86E-04 | 7.45E-03 | 0.82 | HL_1       |
| hsa-miR-6741-5p  | -1.28 | 12.53 | 4.01E-04 | 6.66E-03 | 0.75 | HL_1       |
| hsa-miR-636      | -1.23 | 17.48 | 2.91E-05 | 7.24E-04 | 0.83 | HL_1       |
| hsa-miR-328      | -1.21 | 12.85 | 3.38E-04 | 5.91E-03 | 0.72 | HL_1       |
| hsa-miR-190b     | -1.21 | 10.90 | 9.59E-04 | 1.19E-02 | 0.70 | HL_1       |
| hsa-miR-21-3p    | -1.15 | 10.14 | 1.45E-03 | 1.50E-02 | 0.67 | HL_1       |
| hsa-miR-3605-5p  | -1.14 | 8.71  | 3.16E-03 | 2.93E-02 | 0.76 | HL_1       |
| hsa-miR-548b-5p  | -1.08 | 7.63  | 5.74E-03 | 4.53E-02 | 0.72 | HL_1       |
| hsa-miR-6793-3p  | -1.06 | 10.44 | 1.23E-03 | 1.35E-02 | 0.73 | HL_1       |
| hsa-miR-5010-5p  | -1.05 | 8.64  | 3.30E-03 | 3.02E-02 | 0.67 | HL_1       |

|                  |       |       |          |          |      |      |
|------------------|-------|-------|----------|----------|------|------|
| hsa-miR-1976     | -0.98 | 7.93  | 4.87E-03 | 4.04E-02 | 0.69 | HL_1 |
| hsa-miR-1270     | -0.94 | 11.00 | 9.10E-04 | 1.19E-02 | 0.72 | HL_1 |
| hsa-miR-193a-5p  | -0.86 | 7.71  | 5.49E-03 | 4.46E-02 | 0.75 | HL_1 |
| hsa-miR-532-5p   | -0.82 | 11.24 | 8.02E-04 | 1.11E-02 | 0.75 | HL_1 |
| hsa-miR-1255b-5p | -0.78 | 7.98  | 4.72E-03 | 3.96E-02 | 0.73 | HL_1 |
| hsa-miR-454-5p   | 0.56  | 8.03  | 4.59E-03 | 3.90E-02 | 0.81 | HL_1 |
| hsa-miR-548ap-3p | 0.68  | 8.20  | 4.19E-03 | 3.67E-02 | 0.75 | HL_1 |
| hsa-miR-335-5p   | 0.77  | 10.05 | 1.53E-03 | 1.56E-02 | 0.76 | HL_1 |
| hsa-miR-589-3p   | 0.79  | 7.50  | 6.17E-03 | 4.82E-02 | 0.74 | HL_1 |
| hsa-miR-7-1-3p   | 0.84  | 12.55 | 3.95E-04 | 6.66E-03 | 0.79 | HL_1 |
| hsa-miR-19b-1-5p | 0.84  | 10.94 | 9.39E-04 | 1.19E-02 | 0.63 | HL_1 |
| hsa-miR-421      | 0.85  | 17.99 | 2.22E-05 | 6.59E-04 | 0.86 | HL_1 |
| hsa-miR-378i     | 0.86  | 9.51  | 2.04E-03 | 2.01E-02 | 0.68 | HL_1 |
| hsa-miR-33a-3p   | 0.87  | 7.86  | 5.06E-03 | 4.16E-02 | 0.74 | HL_1 |
| hsa-miR-151a-3p  | 0.87  | 11.63 | 6.49E-04 | 9.75E-03 | 0.77 | HL_1 |
| hsa-miR-28-3p    | 0.87  | 10.63 | 1.11E-03 | 1.27E-02 | 0.77 | HL_1 |
| hsa-let-7f-1-3p  | 0.91  | 11.23 | 8.04E-04 | 1.11E-02 | 0.74 | HL_1 |
| hsa-miR-99a-5p   | 0.94  | 14.89 | 1.14E-04 | 2.27E-03 | 0.83 | HL_1 |
| hsa-miR-503      | 0.95  | 17.72 | 2.56E-05 | 6.80E-04 | 0.82 | HL_1 |
| hsa-miR-143-3p   | 0.95  | 10.75 | 1.04E-03 | 1.21E-02 | 0.65 | HL_1 |
| hsa-miR-3909     | 0.98  | 11.18 | 8.25E-04 | 1.12E-02 | 0.69 | HL_1 |
| hsa-miR-641      | 0.99  | 10.91 | 9.56E-04 | 1.19E-02 | 0.66 | HL_1 |
| hsa-let-7b-3p    | 1.04  | 11.22 | 8.07E-04 | 1.11E-02 | 0.66 | HL_1 |
| hsa-miR-150-3p   | 1.06  | 9.28  | 2.32E-03 | 2.23E-02 | 0.66 | HL_1 |
| hsa-miR-625-5p   | 1.06  | 17.97 | 2.25E-05 | 6.59E-04 | 0.78 | HL_1 |
| hsa-miR-576-3p   | 1.09  | 13.94 | 1.88E-04 | 3.66E-03 | 0.77 | HL_1 |
| hsa-miR-551b-3p  | 1.11  | 9.62  | 1.92E-03 | 1.94E-02 | 0.62 | HL_1 |
| hsa-miR-502-5p   | 1.13  | 13.73 | 2.11E-04 | 4.01E-03 | 0.80 | HL_1 |
| hsa-miR-378d     | 1.20  | 16.82 | 4.10E-05 | 9.62E-04 | 0.76 | HL_1 |
| hsa-miR-22-5p    | 1.25  | 27.50 | 1.57E-07 | 1.66E-05 | 0.84 | HL_1 |
| hsa-miR-376c     | 1.26  | 17.91 | 2.31E-05 | 6.59E-04 | 0.77 | HL_1 |
| hsa-miR-338-3p   | 1.30  | 18.35 | 1.84E-05 | 6.11E-04 | 0.75 | HL_1 |
| hsa-miR-551a     | 1.41  | 7.64  | 5.71E-03 | 4.53E-02 | 0.65 | HL_1 |
| hsa-miR-652-5p   | 1.43  | 27.87 | 1.30E-07 | 1.66E-05 | 0.86 | HL_1 |
| hsa-miR-296-5p   | 1.45  | 17.65 | 2.65E-05 | 6.81E-04 | 0.78 | HL_1 |
| hsa-miR-376a-3p  | 1.47  | 17.83 | 2.42E-05 | 6.65E-04 | 0.81 | HL_1 |
| hsa-miR-494      | 1.48  | 19.10 | 1.24E-05 | 4.30E-04 | 0.80 | HL_1 |
| hsa-miR-20a-3p   | 1.50  | 23.22 | 1.44E-06 | 1.05E-04 | 0.83 | HL_1 |
| hsa-miR-136-5p   | 1.51  | 8.04  | 4.58E-03 | 3.90E-02 | 0.73 | HL_1 |
| hsa-miR-4690-3p  | 1.55  | 12.17 | 4.85E-04 | 7.45E-03 | 0.68 | HL_1 |
| hsa-miR-199b-5p  | 1.58  | 30.28 | 3.75E-08 | 7.47E-06 | 0.79 | HL_1 |
| hsa-miR-181d     | 1.61  | 8.20  | 4.19E-03 | 3.67E-02 | 0.66 | HL_1 |
| hsa-miR-378c     | 1.65  | 56.91 | 4.57E-14 | 3.64E-11 | 0.96 | HL_1 |
| hsa-miR-4454     | 1.66  | 27.39 | 1.66E-07 | 1.66E-05 | 0.83 | HL_1 |
| hsa-miR-362-5p   | 1.68  | 31.59 | 1.91E-08 | 5.06E-06 | 0.92 | HL_1 |
| hsa-miR-542-3p   | 1.72  | 22.09 | 2.60E-06 | 1.59E-04 | 0.85 | HL_1 |
| hsa-miR-2355-5p  | 1.72  | 10.96 | 9.29E-04 | 1.19E-02 | 0.71 | HL_1 |
| hsa-miR-3074-3p  | 1.79  | 10.89 | 9.67E-04 | 1.19E-02 | 0.68 | HL_1 |
| hsa-miR-492      | 1.86  | 10.56 | 1.16E-03 | 1.30E-02 | 0.63 | HL_1 |
| hsa-miR-3683     | 1.87  | 11.54 | 6.82E-04 | 1.01E-02 | 0.70 | HL_1 |
| hsa-miR-378f     | 1.95  | 20.52 | 5.90E-06 | 3.01E-04 | 0.73 | HL_1 |

|                  |       |       |          |          |      |         |
|------------------|-------|-------|----------|----------|------|---------|
| hsa-miR-1537     | 2.09  | 22.22 | 2.43E-06 | 1.59E-04 | 0.79 | HL_1    |
| hsa-miR-34c-5p   | 2.20  | 10.83 | 1.00E-03 | 1.20E-02 | 0.63 | HL_1    |
| hsa-miR-1226-5p  | 2.23  | 16.66 | 4.46E-05 | 1.02E-03 | 0.65 | HL_1    |
| hsa-miR-4785     | 2.41  | 20.33 | 6.50E-06 | 3.01E-04 | 0.76 | HL_1    |
| hsa-miR-34a-3p   | 2.78  | 14.95 | 1.10E-04 | 2.26E-03 | 0.63 | HL_1    |
| hsa-miR-34a-5p   | 3.33  | 43.29 | 4.72E-11 | 1.88E-08 | 0.73 | HL_1    |
| hsa-miR-124-3p   | 3.57  | 25.05 | 5.59E-07 | 4.95E-05 | 0.75 | HL_1    |
| hsa-miR-1        | -3.32 | 10.88 | 9.72E-04 | 7.02E-03 | 0.52 | DLBCL_1 |
| hsa-miR-4695-3p  | -2.52 | 10.13 | 1.46E-03 | 9.78E-03 | 0.34 | DLBCL_1 |
| hsa-miR-31-3p    | -2.48 | 11.32 | 7.67E-04 | 5.64E-03 | 0.34 | DLBCL_1 |
| hsa-let-7c       | -2.39 | 50.77 | 1.04E-12 | 1.00E-10 | 0.96 | DLBCL_1 |
| hsa-miR-4443     | -2.37 | 9.14  | 2.50E-03 | 1.54E-02 | 0.37 | DLBCL_1 |
| hsa-miR-6741-3p  | -2.35 | 14.46 | 1.43E-04 | 1.33E-03 | 0.66 | DLBCL_1 |
| hsa-miR-1228-3p  | -2.30 | 12.45 | 4.17E-04 | 3.39E-03 | 0.33 | DLBCL_1 |
| hsa-miR-3591-3p  | -2.21 | 10.12 | 1.47E-03 | 9.78E-03 | 0.36 | DLBCL_1 |
| hsa-miR-874      | -2.17 | 7.98  | 4.73E-03 | 2.54E-02 | 0.40 | DLBCL_1 |
| hsa-miR-92a-3p   | -2.11 | 68.97 | 1.00E-16 | 1.54E-14 | 0.95 | DLBCL_1 |
| hsa-miR-935      | -1.95 | 7.80  | 5.24E-03 | 2.75E-02 | 0.38 | DLBCL_1 |
| hsa-miR-1234     | -1.93 | 8.94  | 2.80E-03 | 1.62E-02 | 0.34 | DLBCL_1 |
| hsa-miR-149-5p   | -1.93 | 7.86  | 5.06E-03 | 2.68E-02 | 0.39 | DLBCL_1 |
| hsa-miR-335-3p   | -1.82 | 9.00  | 2.69E-03 | 1.60E-02 | 0.67 | DLBCL_1 |
| hsa-miR-1275     | -1.80 | 8.52  | 3.52E-03 | 1.94E-02 | 0.35 | DLBCL_1 |
| hsa-miR-193b-3p  | -1.75 | 9.04  | 2.64E-03 | 1.59E-02 | 0.69 | DLBCL_1 |
| hsa-miR-4738-3p  | -1.71 | 7.48  | 6.25E-03 | 3.16E-02 | 0.45 | DLBCL_1 |
| hsa-miR-150-5p   | -1.58 | 19.74 | 8.88E-06 | 1.16E-04 | 0.84 | DLBCL_1 |
| hsa-miR-3064-5p  | -1.51 | 7.67  | 5.60E-03 | 2.90E-02 | 0.61 | DLBCL_1 |
| hsa-miR-939      | -1.44 | 15.94 | 6.55E-05 | 6.57E-04 | 0.83 | DLBCL_1 |
| hsa-let-7i-3p    | -1.42 | 16.45 | 5.00E-05 | 5.22E-04 | 0.75 | DLBCL_1 |
| hsa-miR-1180     | -1.41 | 22.21 | 2.44E-06 | 3.70E-05 | 0.85 | DLBCL_1 |
| hsa-miR-1270     | -1.34 | 19.83 | 8.46E-06 | 1.13E-04 | 0.86 | DLBCL_1 |
| hsa-miR-1304-5p  | -1.33 | 15.91 | 6.66E-05 | 6.59E-04 | 0.74 | DLBCL_1 |
| hsa-miR-92b-3p   | -1.32 | 27.83 | 1.32E-07 | 3.10E-06 | 0.86 | DLBCL_1 |
| hsa-miR-3150b-3p | -1.32 | 7.85  | 5.08E-03 | 2.68E-02 | 0.69 | DLBCL_1 |
| hsa-let-7f-5p    | -1.28 | 78.85 | 6.70E-19 | 2.59E-16 | 0.98 | DLBCL_1 |
| hsa-miR-4742-3p  | -1.26 | 11.67 | 6.37E-04 | 4.77E-03 | 0.74 | DLBCL_1 |
| hsa-miR-23a-5p   | -1.21 | 7.44  | 6.37E-03 | 3.20E-02 | 0.60 | DLBCL_1 |
| hsa-miR-574-5p   | -1.21 | 18.76 | 1.48E-05 | 1.84E-04 | 0.82 | DLBCL_1 |
| hsa-miR-342-5p   | -1.20 | 23.06 | 1.57E-06 | 2.58E-05 | 0.87 | DLBCL_1 |
| hsa-let-7b-5p    | -1.16 | 24.31 | 8.21E-07 | 1.51E-05 | 0.84 | DLBCL_1 |
| hsa-miR-629-5p   | -1.10 | 25.62 | 4.15E-07 | 8.66E-06 | 0.85 | DLBCL_1 |
| hsa-let-7a-5p    | -1.08 | 69.60 | 7.27E-17 | 1.40E-14 | 0.96 | DLBCL_1 |
| hsa-miR-4448     | -1.07 | 6.92  | 8.55E-03 | 4.05E-02 | 0.69 | DLBCL_1 |
| hsa-miR-1301     | -1.04 | 13.67 | 2.18E-04 | 1.91E-03 | 0.80 | DLBCL_1 |
| hsa-miR-98       | -0.97 | 33.37 | 7.62E-09 | 2.80E-07 | 0.95 | DLBCL_1 |
| hsa-miR-342-3p   | -0.94 | 13.96 | 1.87E-04 | 1.70E-03 | 0.79 | DLBCL_1 |
| hsa-miR-6741-5p  | -0.94 | 6.68  | 9.74E-03 | 4.53E-02 | 0.69 | DLBCL_1 |
| hsa-miR-1287     | -0.94 | 12.11 | 5.01E-04 | 3.91E-03 | 0.76 | DLBCL_1 |
| hsa-miR-4732-3p  | -0.93 | 9.10  | 2.55E-03 | 1.55E-02 | 0.70 | DLBCL_1 |
| hsa-let-7e-5p    | -0.93 | 20.30 | 6.62E-06 | 8.97E-05 | 0.86 | DLBCL_1 |
| hsa-miR-636      | -0.93 | 9.03  | 2.66E-03 | 1.59E-02 | 0.78 | DLBCL_1 |
| hsa-miR-190b     | -0.92 | 6.61  | 1.01E-02 | 4.66E-02 | 0.69 | DLBCL_1 |



|                  |       |       |          |          |      |         |
|------------------|-------|-------|----------|----------|------|---------|
| hsa-miR-4685-3p  | -0.89 | 8.08  | 4.48E-03 | 2.42E-02 | 0.72 | DLBCL_1 |
| hsa-miR-4433b-5p | -0.88 | 7.15  | 7.49E-03 | 3.61E-02 | 0.69 | DLBCL_1 |
| hsa-miR-1303     | -0.87 | 7.74  | 5.39E-03 | 2.81E-02 | 0.75 | DLBCL_1 |
| hsa-miR-423-5p   | -0.80 | 9.67  | 1.87E-03 | 1.19E-02 | 0.73 | DLBCL_1 |
| hsa-let-7d-5p    | -0.77 | 24.68 | 6.77E-07 | 1.31E-05 | 0.92 | DLBCL_1 |
| hsa-miR-1294     | -0.75 | 8.35  | 3.85E-03 | 2.11E-02 | 0.75 | DLBCL_1 |
| hsa-miR-2110     | -0.75 | 8.75  | 3.10E-03 | 1.77E-02 | 0.75 | DLBCL_1 |
| hsa-let-7g-5p    | -0.75 | 25.23 | 5.08E-07 | 1.03E-05 | 0.87 | DLBCL_1 |
| hsa-miR-15b-5p   | -0.68 | 10.42 | 1.24E-03 | 8.65E-03 | 0.76 | DLBCL_1 |
| hsa-miR-584-5p   | -0.65 | 10.50 | 1.19E-03 | 8.44E-03 | 0.74 | DLBCL_1 |
| hsa-let-7i-5p    | -0.54 | 6.56  | 1.05E-02 | 4.78E-02 | 0.72 | DLBCL_1 |
| hsa-miR-451a     | 0.40  | 13.46 | 2.44E-04 | 2.09E-03 | 0.80 | DLBCL_1 |
| hsa-miR-454-3p   | 0.43  | 7.27  | 7.00E-03 | 3.42E-02 | 0.76 | DLBCL_1 |
| hsa-miR-107      | 0.51  | 18.66 | 1.57E-05 | 1.89E-04 | 0.84 | DLBCL_1 |
| hsa-miR-23b-3p   | 0.53  | 7.48  | 6.25E-03 | 3.16E-02 | 0.71 | DLBCL_1 |
| hsa-miR-101-3p   | 0.63  | 10.64 | 1.11E-03 | 7.91E-03 | 0.72 | DLBCL_1 |
| hsa-miR-424-5p   | 0.64  | 7.04  | 7.95E-03 | 3.81E-02 | 0.67 | DLBCL_1 |
| hsa-miR-185-5p   | 0.64  | 12.83 | 3.41E-04 | 2.83E-03 | 0.81 | DLBCL_1 |
| hsa-miR-27a-3p   | 0.64  | 8.72  | 3.15E-03 | 1.79E-02 | 0.77 | DLBCL_1 |
| hsa-miR-140-5p   | 0.64  | 7.29  | 6.92E-03 | 3.40E-02 | 0.73 | DLBCL_1 |
| hsa-miR-361-3p   | 0.65  | 8.26  | 4.05E-03 | 2.20E-02 | 0.74 | DLBCL_1 |
| hsa-miR-126-3p   | 0.65  | 11.13 | 8.49E-04 | 6.18E-03 | 0.78 | DLBCL_1 |
| hsa-miR-27b-3p   | 0.66  | 8.69  | 3.19E-03 | 1.80E-02 | 0.76 | DLBCL_1 |
| hsa-miR-19a-3p   | 0.67  | 14.70 | 1.26E-04 | 1.20E-03 | 0.78 | DLBCL_1 |
| hsa-miR-29a-3p   | 0.69  | 12.75 | 3.55E-04 | 2.92E-03 | 0.79 | DLBCL_1 |
| hsa-miR-93-5p    | 0.69  | 10.01 | 1.56E-03 | 1.01E-02 | 0.68 | DLBCL_1 |
| hsa-miR-28-5p    | 0.69  | 10.00 | 1.57E-03 | 1.01E-02 | 0.76 | DLBCL_1 |
| hsa-miR-374b-5p  | 0.70  | 16.54 | 4.77E-05 | 5.05E-04 | 0.80 | DLBCL_1 |
| hsa-miR-17-3p    | 0.71  | 18.21 | 1.98E-05 | 2.28E-04 | 0.87 | DLBCL_1 |
| hsa-miR-17-5p    | 0.72  | 17.30 | 3.19E-05 | 3.62E-04 | 0.82 | DLBCL_1 |
| hsa-miR-18b-5p   | 0.73  | 20.99 | 4.62E-06 | 6.73E-05 | 0.87 | DLBCL_1 |
| hsa-miR-21-5p    | 0.74  | 22.28 | 2.36E-06 | 3.64E-05 | 0.84 | DLBCL_1 |
| hsa-miR-148b-5p  | 0.74  | 10.31 | 1.33E-03 | 8.98E-03 | 0.66 | DLBCL_1 |
| hsa-miR-324-5p   | 0.74  | 10.33 | 1.31E-03 | 8.92E-03 | 0.79 | DLBCL_1 |
| hsa-miR-660-3p   | 0.74  | 10.46 | 1.22E-03 | 8.55E-03 | 0.80 | DLBCL_1 |
| hsa-miR-301a-3p  | 0.75  | 13.36 | 2.57E-04 | 2.18E-03 | 0.77 | DLBCL_1 |
| hsa-miR-18a-5p   | 0.75  | 23.77 | 1.09E-06 | 1.90E-05 | 0.88 | DLBCL_1 |
| hsa-miR-548ap-3p | 0.75  | 11.87 | 5.71E-04 | 4.37E-03 | 0.85 | DLBCL_1 |
| hsa-miR-660-5p   | 0.75  | 19.49 | 1.01E-05 | 1.28E-04 | 0.85 | DLBCL_1 |
| hsa-miR-335-5p   | 0.76  | 8.99  | 2.71E-03 | 1.60E-02 | 0.75 | DLBCL_1 |
| hsa-miR-769-5p   | 0.76  | 7.15  | 7.48E-03 | 3.61E-02 | 0.76 | DLBCL_1 |
| hsa-miR-598      | 0.77  | 7.34  | 6.73E-03 | 3.33E-02 | 0.73 | DLBCL_1 |
| hsa-miR-363-3p   | 0.79  | 23.75 | 1.10E-06 | 1.90E-05 | 0.91 | DLBCL_1 |
| hsa-miR-19b-3p   | 0.82  | 27.29 | 1.75E-07 | 3.97E-06 | 0.85 | DLBCL_1 |
| hsa-miR-106a-3p  | 0.83  | 8.55  | 3.46E-03 | 1.92E-02 | 0.71 | DLBCL_1 |
| hsa-miR-7-1-3p   | 0.85  | 13.05 | 3.03E-04 | 2.54E-03 | 0.85 | DLBCL_1 |
| hsa-miR-103a-3p  | 0.85  | 55.07 | 1.16E-13 | 1.28E-11 | 0.96 | DLBCL_1 |
| hsa-miR-222-3p   | 0.87  | 20.50 | 5.95E-06 | 8.20E-05 | 0.85 | DLBCL_1 |
| hsa-miR-23a-3p   | 0.88  | 18.73 | 1.51E-05 | 1.85E-04 | 0.81 | DLBCL_1 |
| hsa-miR-625-5p   | 0.88  | 13.93 | 1.89E-04 | 1.70E-03 | 0.75 | DLBCL_1 |
| hsa-miR-33a-3p   | 0.90  | 10.01 | 1.56E-03 | 1.01E-02 | 0.86 | DLBCL_1 |

|                 |      |       |          |          |      |         |
|-----------------|------|-------|----------|----------|------|---------|
| hsa-miR-150-3p  | 0.90 | 7.53  | 6.06E-03 | 3.10E-02 | 0.71 | DLBCL_1 |
| hsa-miR-425-5p  | 0.91 | 27.84 | 1.32E-07 | 3.10E-06 | 0.81 | DLBCL_1 |
| hsa-miR-616-5p  | 0.91 | 7.35  | 6.72E-03 | 3.33E-02 | 0.76 | DLBCL_1 |
| hsa-miR-185-3p  | 0.92 | 8.97  | 2.74E-03 | 1.60E-02 | 0.71 | DLBCL_1 |
| hsa-miR-641     | 0.93 | 9.59  | 1.96E-03 | 1.23E-02 | 0.70 | DLBCL_1 |
| hsa-miR-330-5p  | 0.93 | 6.70  | 9.66E-03 | 4.52E-02 | 0.69 | DLBCL_1 |
| hsa-miR-151a-3p | 0.93 | 13.87 | 1.96E-04 | 1.74E-03 | 0.85 | DLBCL_1 |
| hsa-miR-186-5p  | 0.93 | 20.82 | 5.04E-06 | 7.07E-05 | 0.85 | DLBCL_1 |
| hsa-miR-501-5p  | 0.93 | 12.40 | 4.30E-04 | 3.46E-03 | 0.80 | DLBCL_1 |
| hsa-miR-421     | 0.94 | 19.53 | 9.89E-06 | 1.27E-04 | 0.89 | DLBCL_1 |
| hsa-miR-503     | 0.95 | 17.15 | 3.46E-05 | 3.81E-04 | 0.84 | DLBCL_1 |
| hsa-miR-16-2-3p | 0.95 | 15.53 | 8.14E-05 | 7.95E-04 | 0.75 | DLBCL_1 |
| hsa-miR-590-5p  | 0.95 | 21.77 | 3.08E-06 | 4.57E-05 | 0.83 | DLBCL_1 |
| hsa-miR-20b-5p  | 0.95 | 30.34 | 3.62E-08 | 1.08E-06 | 0.92 | DLBCL_1 |
| hsa-miR-106a-5p | 0.96 | 31.18 | 2.36E-08 | 7.76E-07 | 0.92 | DLBCL_1 |
| hsa-miR-576-3p  | 0.97 | 9.66  | 1.88E-03 | 1.19E-02 | 0.81 | DLBCL_1 |
| hsa-miR-142-5p  | 0.97 | 24.35 | 8.02E-07 | 1.51E-05 | 0.85 | DLBCL_1 |
| hsa-miR-143-3p  | 0.99 | 14.57 | 1.35E-04 | 1.27E-03 | 0.80 | DLBCL_1 |
| hsa-miR-497-5p  | 1.03 | 10.38 | 1.27E-03 | 8.76E-03 | 0.77 | DLBCL_1 |
| hsa-miR-192-5p  | 1.06 | 43.93 | 3.41E-11 | 2.19E-09 | 0.91 | DLBCL_1 |
| hsa-miR-589-3p  | 1.07 | 11.43 | 7.22E-04 | 5.36E-03 | 0.76 | DLBCL_1 |
| hsa-miR-188-5p  | 1.08 | 18.53 | 1.67E-05 | 1.98E-04 | 0.86 | DLBCL_1 |
| hsa-miR-210     | 1.08 | 40.54 | 1.93E-10 | 1.06E-08 | 0.92 | DLBCL_1 |
| hsa-miR-326     | 1.08 | 16.09 | 6.05E-05 | 6.15E-04 | 0.77 | DLBCL_1 |
| hsa-miR-215     | 1.11 | 11.69 | 6.28E-04 | 4.75E-03 | 0.81 | DLBCL_1 |
| hsa-miR-500a-3p | 1.12 | 36.49 | 1.54E-09 | 6.58E-08 | 0.93 | DLBCL_1 |
| hsa-miR-194-5p  | 1.12 | 28.27 | 1.06E-07 | 2.81E-06 | 0.84 | DLBCL_1 |
| hsa-miR-338-3p  | 1.13 | 16.54 | 4.77E-05 | 5.05E-04 | 0.77 | DLBCL_1 |
| hsa-miR-20a-3p  | 1.14 | 18.41 | 1.78E-05 | 2.08E-04 | 0.84 | DLBCL_1 |
| hsa-miR-30d-5p  | 1.14 | 25.92 | 3.56E-07 | 7.62E-06 | 0.81 | DLBCL_1 |
| hsa-miR-378a-3p | 1.15 | 31.13 | 2.41E-08 | 7.76E-07 | 0.87 | DLBCL_1 |
| hsa-miR-542-3p  | 1.15 | 9.25  | 2.35E-03 | 1.47E-02 | 0.76 | DLBCL_1 |
| hsa-miR-339-5p  | 1.16 | 23.67 | 1.14E-06 | 1.92E-05 | 0.85 | DLBCL_1 |
| hsa-miR-502-3p  | 1.18 | 42.86 | 5.88E-11 | 3.49E-09 | 0.95 | DLBCL_1 |
| hsa-miR-181a-3p | 1.26 | 12.30 | 4.53E-04 | 3.60E-03 | 0.77 | DLBCL_1 |
| hsa-miR-26a-5p  | 1.27 | 48.92 | 2.67E-12 | 2.06E-10 | 0.92 | DLBCL_1 |
| hsa-miR-4286    | 1.27 | 22.74 | 1.85E-06 | 2.92E-05 | 0.80 | DLBCL_1 |
| hsa-miR-378i    | 1.29 | 27.99 | 1.22E-07 | 3.10E-06 | 0.85 | DLBCL_1 |
| hsa-miR-181b-5p | 1.30 | 37.84 | 7.69E-10 | 3.49E-08 | 0.90 | DLBCL_1 |
| hsa-miR-29c-5p  | 1.31 | 49.41 | 2.08E-12 | 1.79E-10 | 0.96 | DLBCL_1 |
| hsa-miR-99a-5p  | 1.37 | 24.95 | 5.88E-07 | 1.16E-05 | 0.88 | DLBCL_1 |
| hsa-miR-199b-5p | 1.37 | 29.54 | 5.48E-08 | 1.57E-06 | 0.81 | DLBCL_1 |
| hsa-miR-551a    | 1.41 | 9.99  | 1.57E-03 | 1.01E-02 | 0.76 | DLBCL_1 |
| hsa-miR-652-5p  | 1.43 | 27.92 | 1.27E-07 | 3.10E-06 | 0.89 | DLBCL_1 |
| hsa-miR-3120-3p | 1.43 | 7.62  | 5.78E-03 | 2.98E-02 | 0.75 | DLBCL_1 |
| hsa-miR-3909    | 1.44 | 28.43 | 9.74E-08 | 2.68E-06 | 0.84 | DLBCL_1 |
| hsa-miR-502-5p  | 1.44 | 30.34 | 3.63E-08 | 1.08E-06 | 0.97 | DLBCL_1 |
| hsa-miR-3117-3p | 1.47 | 9.13  | 2.51E-03 | 1.54E-02 | 0.72 | DLBCL_1 |
| hsa-miR-140-3p  | 1.47 | 39.65 | 3.04E-10 | 1.56E-08 | 0.90 | DLBCL_1 |
| hsa-miR-1273c   | 1.49 | 17.10 | 3.55E-05 | 3.86E-04 | 0.85 | DLBCL_1 |
| hsa-miR-3687    | 1.49 | 8.76  | 3.09E-03 | 1.77E-02 | 0.70 | DLBCL_1 |



|                  |       |       |          |          |      |         |
|------------------|-------|-------|----------|----------|------|---------|
| hsa-miR-188-3p   | 1.55  | 15.39 | 8.73E-05 | 8.42E-04 | 0.75 | DLBCL_1 |
| hsa-miR-4690-3p  | 1.61  | 16.14 | 5.88E-05 | 6.05E-04 | 0.78 | DLBCL_1 |
| hsa-miR-3176     | 1.61  | 8.59  | 3.37E-03 | 1.89E-02 | 0.79 | DLBCL_1 |
| hsa-miR-548at-3p | 1.63  | 6.63  | 1.00E-02 | 4.63E-02 | 0.70 | DLBCL_1 |
| hsa-miR-3922-5p  | 1.64  | 12.16 | 4.90E-04 | 3.86E-03 | 0.75 | DLBCL_1 |
| hsa-miR-4714-3p  | 1.70  | 20.88 | 4.89E-06 | 6.99E-05 | 0.73 | DLBCL_1 |
| hsa-miR-29b-3p   | 1.70  | 38.60 | 5.20E-10 | 2.51E-08 | 0.94 | DLBCL_1 |
| hsa-miR-30a-5p   | 1.73  | 13.65 | 2.20E-04 | 1.91E-03 | 0.71 | DLBCL_1 |
| hsa-miR-378f     | 1.74  | 17.21 | 3.34E-05 | 3.74E-04 | 0.80 | DLBCL_1 |
| hsa-miR-378d     | 1.76  | 45.86 | 1.27E-11 | 8.91E-10 | 0.91 | DLBCL_1 |
| hsa-miR-362-5p   | 1.80  | 33.93 | 5.72E-09 | 2.21E-07 | 0.94 | DLBCL_1 |
| hsa-miR-296-5p   | 1.84  | 26.43 | 2.73E-07 | 6.02E-06 | 0.86 | DLBCL_1 |
| hsa-miR-4772-3p  | 1.84  | 6.92  | 8.53E-03 | 4.05E-02 | 0.64 | DLBCL_1 |
| hsa-miR-548f     | 1.87  | 14.15 | 1.69E-04 | 1.55E-03 | 0.73 | DLBCL_1 |
| hsa-miR-1537     | 1.88  | 23.73 | 1.11E-06 | 1.90E-05 | 0.90 | DLBCL_1 |
| hsa-miR-490-3p   | 1.88  | 6.88  | 8.71E-03 | 4.10E-02 | 0.64 | DLBCL_1 |
| hsa-miR-4454     | 1.93  | 34.98 | 3.34E-09 | 1.36E-07 | 0.93 | DLBCL_1 |
| hsa-miR-378c     | 2.11  | 91.11 | 1.36E-21 | 1.05E-18 | 0.98 | DLBCL_1 |
| hsa-miR-34c-5p   | 2.31  | 11.90 | 5.61E-04 | 4.33E-03 | 0.70 | DLBCL_1 |
| hsa-miR-4785     | 2.72  | 32.90 | 9.72E-09 | 3.41E-07 | 0.89 | DLBCL_1 |
| hsa-miR-29c-3p   | 2.72  | 77.52 | 1.32E-18 | 3.39E-16 | 0.97 | DLBCL_1 |
| hsa-miR-34a-5p   | 3.39  | 58.31 | 2.24E-14 | 2.88E-12 | 0.87 | DLBCL_1 |
| hsa-miR-124-3p   | 3.83  | 22.74 | 1.85E-06 | 2.92E-05 | 0.78 | DLBCL_1 |
| hsa-miR-3180-5p  | -4.12 | 8.61  | 3.34E-03 | 2.12E-02 | 0.37 | HL_3    |
| hsa-miR-197-5p   | -3.32 | 16.44 | 5.01E-05 | 1.02E-03 | 0.76 | HL_3    |
| hsa-miR-4725-3p  | -3.15 | 13.19 | 2.81E-04 | 3.61E-03 | 0.73 | HL_3    |
| hsa-miR-6741-3p  | -3.14 | 12.45 | 4.18E-04 | 4.57E-03 | 0.70 | HL_3    |
| hsa-miR-31-3p    | -3.12 | 12.40 | 4.29E-04 | 4.61E-03 | 0.32 | HL_3    |
| hsa-miR-3591-3p  | -2.95 | 12.56 | 3.93E-04 | 4.36E-03 | 0.32 | HL_3    |
| hsa-miR-3196     | -2.89 | 8.07  | 4.50E-03 | 2.76E-02 | 0.33 | HL_3    |
| hsa-miR-4792     | -2.77 | 10.26 | 1.36E-03 | 1.15E-02 | 0.35 | HL_3    |
| hsa-miR-4446-3p  | -2.67 | 20.41 | 6.25E-06 | 1.83E-04 | 0.82 | HL_3    |
| hsa-miR-3064-5p  | -2.63 | 11.38 | 7.42E-04 | 7.15E-03 | 0.67 | HL_3    |
| hsa-miR-335-3p   | -2.54 | 9.76  | 1.79E-03 | 1.38E-02 | 0.73 | HL_3    |
| hsa-miR-4443     | -2.50 | 6.93  | 8.50E-03 | 4.57E-02 | 0.37 | HL_3    |
| hsa-miR-574-5p   | -2.45 | 30.21 | 3.88E-08 | 2.37E-06 | 0.93 | HL_3    |
| hsa-miR-1228-3p  | -2.44 | 10.11 | 1.47E-03 | 1.18E-02 | 0.33 | HL_3    |
| hsa-miR-204-5p   | -2.42 | 7.68  | 5.58E-03 | 3.27E-02 | 0.38 | HL_3    |
| hsa-miR-3944-3p  | -2.36 | 8.91  | 2.83E-03 | 1.90E-02 | 0.37 | HL_3    |
| hsa-miR-4448     | -2.32 | 12.80 | 3.46E-04 | 4.08E-03 | 0.79 | HL_3    |
| hsa-miR-4750     | -2.29 | 9.56  | 1.99E-03 | 1.50E-02 | 0.72 | HL_3    |
| hsa-miR-92a-3p   | -2.29 | 37.52 | 9.05E-10 | 1.09E-07 | 0.95 | HL_3    |
| hsa-miR-3177-3p  | -2.23 | 15.10 | 1.02E-04 | 1.73E-03 | 0.85 | HL_3    |
| hsa-miR-4687-5p  | -2.09 | 8.87  | 2.90E-03 | 1.91E-02 | 0.69 | HL_3    |
| hsa-miR-939      | -2.07 | 12.71 | 3.63E-04 | 4.22E-03 | 0.84 | HL_3    |
| hsa-miR-1976     | -2.06 | 12.62 | 3.82E-04 | 4.30E-03 | 0.83 | HL_3    |
| hsa-miR-30b-3p   | -2.05 | 10.14 | 1.45E-03 | 1.18E-02 | 0.76 | HL_3    |
| hsa-miR-432-5p   | -2.03 | 8.83  | 2.96E-03 | 1.94E-02 | 0.68 | HL_3    |
| hsa-miR-4301     | -2.03 | 6.79  | 9.16E-03 | 4.82E-02 | 0.38 | HL_3    |
| hsa-miR-433      | -2.01 | 9.20  | 2.42E-03 | 1.72E-02 | 0.72 | HL_3    |
| hsa-miR-1224-5p  | -1.91 | 12.26 | 4.63E-04 | 4.84E-03 | 0.82 | HL_3    |

|                  |       |       |          |          |      |      |
|------------------|-------|-------|----------|----------|------|------|
| hsa-miR-328      | -1.91 | 13.24 | 2.74E-04 | 3.58E-03 | 0.83 | HL_3 |
| hsa-miR-485-3p   | -1.89 | 12.62 | 3.82E-04 | 4.30E-03 | 0.75 | HL_3 |
| hsa-let-7c       | -1.89 | 14.59 | 1.34E-04 | 2.18E-03 | 0.85 | HL_3 |
| hsa-miR-6741-5p  | -1.87 | 9.82  | 1.72E-03 | 1.34E-02 | 0.79 | HL_3 |
| hsa-miR-7854-3p  | -1.86 | 9.48  | 2.07E-03 | 1.55E-02 | 0.68 | HL_3 |
| hsa-miR-1306-3p  | -1.86 | 17.41 | 3.01E-05 | 6.29E-04 | 0.84 | HL_3 |
| hsa-miR-671-3p   | -1.86 | 10.93 | 9.47E-04 | 8.66E-03 | 0.74 | HL_3 |
| hsa-miR-4659b-3p | -1.85 | 7.39  | 6.57E-03 | 3.66E-02 | 0.67 | HL_3 |
| hsa-miR-3150b-3p | -1.82 | 7.46  | 6.30E-03 | 3.60E-02 | 0.68 | HL_3 |
| hsa-miR-1280     | -1.81 | 14.76 | 1.22E-04 | 2.03E-03 | 0.78 | HL_3 |
| hsa-let-7i-3p    | -1.79 | 12.83 | 3.41E-04 | 4.08E-03 | 0.78 | HL_3 |
| hsa-miR-3605-5p  | -1.76 | 12.11 | 5.02E-04 | 5.17E-03 | 0.78 | HL_3 |
| hsa-miR-4747-5p  | -1.74 | 9.30  | 2.29E-03 | 1.64E-02 | 0.70 | HL_3 |
| hsa-miR-1270     | -1.73 | 15.18 | 9.79E-05 | 1.73E-03 | 0.89 | HL_3 |
| hsa-let-7e-5p    | -1.69 | 35.25 | 2.90E-09 | 2.65E-07 | 0.98 | HL_3 |
| hsa-miR-342-5p   | -1.69 | 18.51 | 1.69E-05 | 3.87E-04 | 0.91 | HL_3 |
| hsa-let-7f-5p    | -1.69 | 85.10 | 2.84E-20 | 6.93E-18 | 1.00 | HL_3 |
| hsa-miR-4433b-3p | -1.66 | 7.70  | 5.54E-03 | 3.27E-02 | 0.73 | HL_3 |
| hsa-miR-766-5p   | -1.65 | 7.38  | 6.59E-03 | 3.66E-02 | 0.68 | HL_3 |
| hsa-miR-629-5p   | -1.63 | 27.36 | 1.69E-07 | 8.81E-06 | 0.93 | HL_3 |
| hsa-let-7a-5p    | -1.60 | 96.25 | 1.01E-22 | 3.71E-20 | 1.00 | HL_3 |
| hsa-let-7b-5p    | -1.53 | 20.62 | 5.61E-06 | 1.71E-04 | 0.94 | HL_3 |
| hsa-miR-150-5p   | -1.53 | 11.71 | 6.23E-04 | 6.33E-03 | 0.80 | HL_3 |
| hsa-miR-1294     | -1.53 | 13.36 | 2.58E-04 | 3.43E-03 | 0.87 | HL_3 |
| hsa-miR-4742-3p  | -1.50 | 9.02  | 2.68E-03 | 1.85E-02 | 0.72 | HL_3 |
| hsa-miR-92b-3p   | -1.49 | 13.45 | 2.45E-04 | 3.32E-03 | 0.88 | HL_3 |
| hsa-miR-4685-3p  | -1.45 | 9.36  | 2.21E-03 | 1.60E-02 | 0.81 | HL_3 |
| hsa-miR-4732-3p  | -1.45 | 11.06 | 8.82E-04 | 8.39E-03 | 0.78 | HL_3 |
| hsa-miR-1303     | -1.44 | 7.39  | 6.55E-03 | 3.66E-02 | 0.79 | HL_3 |
| hsa-miR-1304-5p  | -1.43 | 10.99 | 9.18E-04 | 8.50E-03 | 0.74 | HL_3 |
| hsa-let-7d-3p    | -1.43 | 13.45 | 2.45E-04 | 3.32E-03 | 0.84 | HL_3 |
| hsa-miR-98       | -1.43 | 37.24 | 1.05E-09 | 1.09E-07 | 0.99 | HL_3 |
| hsa-miR-636      | -1.42 | 11.48 | 7.04E-04 | 6.87E-03 | 0.83 | HL_3 |
| hsa-miR-4433b-5p | -1.38 | 10.04 | 1.53E-03 | 1.22E-02 | 0.81 | HL_3 |
| hsa-miR-1180     | -1.38 | 9.44  | 2.13E-03 | 1.56E-02 | 0.85 | HL_3 |
| hsa-miR-1301     | -1.35 | 10.19 | 1.41E-03 | 1.18E-02 | 0.83 | HL_3 |
| hsa-miR-664-5p   | -1.34 | 7.57  | 5.92E-03 | 3.44E-02 | 0.70 | HL_3 |
| hsa-miR-493-5p   | -1.34 | 6.74  | 9.42E-03 | 4.86E-02 | 0.66 | HL_3 |
| hsa-miR-423-5p   | -1.34 | 13.06 | 3.02E-04 | 3.75E-03 | 0.85 | HL_3 |
| hsa-miR-548ap-5p | -1.33 | 8.06  | 4.52E-03 | 2.76E-02 | 0.76 | HL_3 |
| hsa-miR-1255b-5p | -1.32 | 12.27 | 4.60E-04 | 4.84E-03 | 0.85 | HL_3 |
| hsa-miR-363-5p   | -1.32 | 6.98  | 8.25E-03 | 4.47E-02 | 0.73 | HL_3 |
| hsa-miR-193a-5p  | -1.27 | 8.90  | 2.86E-03 | 1.90E-02 | 0.80 | HL_3 |
| hsa-miR-3940-3p  | -1.27 | 7.92  | 4.89E-03 | 2.95E-02 | 0.78 | HL_3 |
| hsa-miR-197-3p   | -1.25 | 10.59 | 1.13E-03 | 1.00E-02 | 0.82 | HL_3 |
| hsa-miR-2110     | -1.25 | 14.06 | 1.77E-04 | 2.59E-03 | 0.92 | HL_3 |
| hsa-miR-1304-3p  | -1.20 | 9.63  | 1.92E-03 | 1.46E-02 | 0.73 | HL_3 |
| hsa-miR-101-5p   | -1.18 | 11.54 | 6.83E-04 | 6.75E-03 | 0.88 | HL_3 |
| hsa-miR-1285-3p  | -1.16 | 7.03  | 8.02E-03 | 4.38E-02 | 0.77 | HL_3 |
| hsa-miR-324-3p   | -1.01 | 6.80  | 9.14E-03 | 4.82E-02 | 0.77 | HL_3 |
| hsa-miR-26b-3p   | -0.95 | 8.20  | 4.19E-03 | 2.62E-02 | 0.75 | HL_3 |

|                 |       |       |          |          |      |      |
|-----------------|-------|-------|----------|----------|------|------|
| hsa-miR-155-5p  | -0.94 | 7.56  | 5.97E-03 | 3.44E-02 | 0.79 | HL_3 |
| hsa-miR-190a    | -0.91 | 10.83 | 1.00E-03 | 9.03E-03 | 0.92 | HL_3 |
| hsa-let-7d-5p   | -0.88 | 15.34 | 8.96E-05 | 1.65E-03 | 0.92 | HL_3 |
| hsa-let-7g-5p   | -0.62 | 9.03  | 2.66E-03 | 1.85E-02 | 0.72 | HL_3 |
| hsa-miR-660-5p  | 0.57  | 6.75  | 9.40E-03 | 4.86E-02 | 0.85 | HL_3 |
| hsa-miR-454-3p  | 0.58  | 6.78  | 9.24E-03 | 4.83E-02 | 0.75 | HL_3 |
| hsa-miR-19b-3p  | 0.72  | 14.01 | 1.81E-04 | 2.60E-03 | 0.85 | HL_3 |
| hsa-miR-223-3p  | 0.73  | 7.34  | 6.73E-03 | 3.70E-02 | 0.63 | HL_3 |
| hsa-miR-126-3p  | 0.75  | 8.46  | 3.62E-03 | 2.29E-02 | 0.78 | HL_3 |
| hsa-miR-590-5p  | 0.76  | 8.97  | 2.75E-03 | 1.88E-02 | 0.82 | HL_3 |
| hsa-miR-191-5p  | 0.78  | 13.14 | 2.90E-04 | 3.66E-03 | 0.78 | HL_3 |
| hsa-miR-107     | 0.79  | 19.08 | 1.25E-05 | 3.05E-04 | 0.78 | HL_3 |
| hsa-miR-18a-5p  | 0.80  | 14.19 | 1.65E-04 | 2.46E-03 | 0.84 | HL_3 |
| hsa-miR-210     | 0.84  | 15.82 | 6.97E-05 | 1.34E-03 | 0.95 | HL_3 |
| hsa-miR-363-3p  | 0.85  | 11.60 | 6.60E-04 | 6.62E-03 | 0.74 | HL_3 |
| hsa-miR-186-5p  | 0.90  | 10.44 | 1.23E-03 | 1.08E-02 | 0.76 | HL_3 |
| hsa-miR-199b-5p | 0.91  | 10.70 | 1.07E-03 | 9.56E-03 | 0.85 | HL_3 |
| hsa-miR-181b-5p | 0.91  | 10.36 | 1.29E-03 | 1.11E-02 | 0.78 | HL_3 |
| hsa-miR-652-5p  | 0.96  | 8.68  | 3.21E-03 | 2.08E-02 | 0.91 | HL_3 |
| hsa-miR-21-5p   | 0.97  | 24.67 | 6.80E-07 | 2.62E-05 | 0.82 | HL_3 |
| hsa-miR-503     | 0.97  | 9.96  | 1.60E-03 | 1.26E-02 | 0.81 | HL_3 |
| hsa-miR-20a-3p  | 0.98  | 7.70  | 5.52E-03 | 3.27E-02 | 0.81 | HL_3 |
| hsa-miR-378a-3p | 0.99  | 12.93 | 3.23E-04 | 3.94E-03 | 0.78 | HL_3 |
| hsa-miR-378i    | 0.99  | 10.18 | 1.42E-03 | 1.18E-02 | 0.83 | HL_3 |
| hsa-miR-324-5p  | 1.00  | 8.92  | 2.82E-03 | 1.90E-02 | 0.73 | HL_3 |
| hsa-miR-29c-5p  | 1.02  | 14.31 | 1.55E-04 | 2.39E-03 | 0.80 | HL_3 |
| hsa-miR-192-5p  | 1.03  | 21.86 | 2.94E-06 | 9.78E-05 | 0.82 | HL_3 |
| hsa-miR-29a-3p  | 1.04  | 15.10 | 1.02E-04 | 1.73E-03 | 0.73 | HL_3 |
| hsa-miR-106a-5p | 1.04  | 25.13 | 5.35E-07 | 2.17E-05 | 0.91 | HL_3 |
| hsa-miR-99a-5p  | 1.08  | 9.44  | 2.12E-03 | 1.56E-02 | 0.79 | HL_3 |
| hsa-miR-20b-5p  | 1.09  | 20.28 | 6.69E-06 | 1.88E-04 | 0.87 | HL_3 |
| hsa-miR-17-5p   | 1.12  | 28.01 | 1.21E-07 | 6.81E-06 | 0.90 | HL_3 |
| hsa-miR-421     | 1.13  | 17.56 | 2.78E-05 | 5.99E-04 | 0.95 | HL_3 |
| hsa-miR-30d-5p  | 1.15  | 13.88 | 1.95E-04 | 2.75E-03 | 0.67 | HL_3 |
| hsa-miR-185-5p  | 1.15  | 25.18 | 5.23E-07 | 2.17E-05 | 0.90 | HL_3 |
| hsa-miR-22-5p   | 1.17  | 10.99 | 9.16E-04 | 8.50E-03 | 0.68 | HL_3 |
| hsa-miR-103a-3p | 1.19  | 60.42 | 7.66E-15 | 1.12E-12 | 0.87 | HL_3 |
| hsa-miR-500a-3p | 1.20  | 17.57 | 2.77E-05 | 5.99E-04 | 0.75 | HL_3 |
| hsa-miR-215     | 1.20  | 8.15  | 4.30E-03 | 2.67E-02 | 0.90 | HL_3 |
| hsa-miR-148b-5p | 1.21  | 19.46 | 1.03E-05 | 2.59E-04 | 0.83 | HL_3 |
| hsa-miR-26a-5p  | 1.26  | 34.77 | 3.72E-09 | 3.02E-07 | 0.92 | HL_3 |
| hsa-miR-222-3p  | 1.28  | 16.10 | 6.00E-05 | 1.19E-03 | 0.62 | HL_3 |
| hsa-miR-1537    | 1.29  | 6.82  | 9.03E-03 | 4.82E-02 | 0.79 | HL_3 |
| hsa-miR-502-3p  | 1.33  | 24.54 | 7.30E-07 | 2.67E-05 | 0.78 | HL_3 |
| hsa-miR-194-5p  | 1.37  | 20.95 | 4.73E-06 | 1.50E-04 | 0.70 | HL_3 |
| hsa-miR-4714-3p | 1.44  | 7.43  | 6.42E-03 | 3.64E-02 | 0.81 | HL_3 |
| hsa-miR-140-3p  | 1.48  | 22.07 | 2.63E-06 | 9.15E-05 | 0.82 | HL_3 |
| hsa-miR-362-5p  | 1.54  | 14.29 | 1.56E-04 | 2.39E-03 | 0.91 | HL_3 |
| hsa-miR-181c-3p | 1.57  | 7.91  | 4.91E-03 | 2.95E-02 | 0.74 | HL_3 |
| hsa-miR-378f    | 1.58  | 9.11  | 2.55E-03 | 1.79E-02 | 0.82 | HL_3 |
| hsa-miR-29c-3p  | 1.59  | 14.42 | 1.46E-04 | 2.32E-03 | 0.80 | HL_3 |

|                 |       |       |          |          |      |         |
|-----------------|-------|-------|----------|----------|------|---------|
| hsa-miR-93-5p   | 1.59  | 32.12 | 1.45E-08 | 9.65E-07 | 0.79 | HL_3    |
| hsa-miR-4454    | 1.63  | 15.34 | 8.99E-05 | 1.65E-03 | 0.78 | HL_3    |
| hsa-miR-378d    | 1.66  | 19.78 | 8.70E-06 | 2.28E-04 | 0.74 | HL_3    |
| hsa-miR-378c    | 1.68  | 33.90 | 5.80E-09 | 4.25E-07 | 0.90 | HL_3    |
| hsa-miR-4690-3p | 1.73  | 10.14 | 1.45E-03 | 1.18E-02 | 0.82 | HL_3    |
| hsa-miR-425-5p  | 1.74  | 64.86 | 8.06E-16 | 1.47E-13 | 0.88 | HL_3    |
| hsa-miR-188-3p  | 1.84  | 8.64  | 3.30E-03 | 2.12E-02 | 0.82 | HL_3    |
| hsa-miR-1307-5p | 2.39  | 26.85 | 2.20E-07 | 1.07E-05 | 0.72 | HL_3    |
| hsa-miR-4785    | 2.44  | 26.32 | 2.89E-07 | 1.32E-05 | 0.98 | HL_3    |
| hsa-miR-124-3p  | 3.77  | 18.69 | 1.54E-05 | 3.63E-04 | 0.84 | HL_3    |
| hsa-miR-34a-3p  | 3.78  | 19.82 | 8.51E-06 | 2.28E-04 | 0.75 | HL_3    |
| hsa-miR-34a-5p  | 3.96  | 96.89 | 7.34E-23 | 3.71E-20 | 0.92 | HL_3    |
| hsa-miR-1       | -3.74 | 6.87  | 8.78E-03 | 4.55E-02 | 0.47 | DLBCL_3 |
| hsa-miR-200b-3p | -3.23 | 13.90 | 1.92E-04 | 1.88E-03 | 0.75 | DLBCL_3 |
| hsa-miR-31-3p   | -2.82 | 7.64  | 5.71E-03 | 3.22E-02 | 0.91 | DLBCL_3 |
| hsa-let-7c      | -2.46 | 26.60 | 2.50E-07 | 5.22E-06 | 0.94 | DLBCL_3 |
| hsa-miR-651     | -2.14 | 7.85  | 5.09E-03 | 2.90E-02 | 0.75 | DLBCL_3 |
| hsa-miR-92a-3p  | -1.70 | 27.66 | 1.45E-07 | 3.29E-06 | 0.90 | DLBCL_3 |
| hsa-miR-150-5p  | -1.50 | 12.30 | 4.54E-04 | 3.73E-03 | 0.80 | DLBCL_3 |
| hsa-let-7i-3p   | -1.42 | 8.31  | 3.93E-03 | 2.39E-02 | 0.74 | DLBCL_3 |
| hsa-let-7f-5p   | -1.28 | 63.15 | 1.92E-15 | 3.71E-13 | 1.00 | DLBCL_3 |
| hsa-let-7a-5p   | -0.95 | 43.59 | 4.05E-11 | 1.74E-09 | 0.97 | DLBCL_3 |
| hsa-miR-98      | -0.89 | 14.01 | 1.82E-04 | 1.82E-03 | 0.95 | DLBCL_3 |
| hsa-miR-151b    | 0.61  | 7.49  | 6.20E-03 | 3.40E-02 | 0.84 | DLBCL_3 |
| hsa-miR-17-5p   | 0.62  | 8.34  | 3.87E-03 | 2.37E-02 | 0.85 | DLBCL_3 |
| hsa-miR-18b-5p  | 0.64  | 8.70  | 3.19E-03 | 1.99E-02 | 0.93 | DLBCL_3 |
| hsa-miR-624-5p  | 0.69  | 6.81  | 9.08E-03 | 4.68E-02 | 0.70 | DLBCL_3 |
| hsa-miR-151a-5p | 0.70  | 9.46  | 2.09E-03 | 1.45E-02 | 0.86 | DLBCL_3 |
| hsa-miR-27a-3p  | 0.71  | 6.69  | 9.68E-03 | 4.96E-02 | 0.81 | DLBCL_3 |
| hsa-miR-454-3p  | 0.71  | 10.58 | 1.15E-03 | 8.60E-03 | 0.93 | DLBCL_3 |
| hsa-miR-374b-5p | 0.74  | 12.69 | 3.68E-04 | 3.16E-03 | 0.86 | DLBCL_3 |
| hsa-miR-101-3p  | 0.76  | 11.30 | 7.75E-04 | 6.12E-03 | 0.82 | DLBCL_3 |
| hsa-miR-501-3p  | 0.77  | 9.99  | 1.57E-03 | 1.11E-02 | 0.76 | DLBCL_3 |
| hsa-miR-16-2-3p | 0.77  | 7.97  | 4.76E-03 | 2.79E-02 | 0.81 | DLBCL_3 |
| hsa-miR-331-5p  | 0.80  | 10.00 | 1.57E-03 | 1.11E-02 | 0.82 | DLBCL_3 |
| hsa-miR-625-3p  | 0.81  | 8.14  | 4.32E-03 | 2.57E-02 | 0.80 | DLBCL_3 |
| hsa-miR-191-5p  | 0.82  | 17.51 | 2.86E-05 | 3.74E-04 | 0.75 | DLBCL_3 |
| hsa-miR-660-5p  | 0.82  | 12.87 | 3.33E-04 | 2.93E-03 | 0.91 | DLBCL_3 |
| hsa-miR-28-5p   | 0.82  | 8.68  | 3.22E-03 | 1.99E-02 | 0.79 | DLBCL_3 |
| hsa-miR-93-3p   | 0.82  | 7.56  | 5.98E-03 | 3.34E-02 | 0.76 | DLBCL_3 |
| hsa-miR-548aa   | 0.82  | 7.91  | 4.93E-03 | 2.83E-02 | 0.82 | DLBCL_3 |
| hsa-miR-548t-3p | 0.82  | 7.90  | 4.94E-03 | 2.83E-02 | 0.82 | DLBCL_3 |
| hsa-miR-505-3p  | 0.84  | 9.11  | 2.55E-03 | 1.66E-02 | 0.83 | DLBCL_3 |
| hsa-miR-106a-5p | 0.86  | 14.79 | 1.20E-04 | 1.29E-03 | 0.94 | DLBCL_3 |
| hsa-miR-335-5p  | 0.86  | 7.45  | 6.33E-03 | 3.45E-02 | 0.77 | DLBCL_3 |
| hsa-miR-142-5p  | 0.86  | 11.13 | 8.49E-04 | 6.56E-03 | 0.83 | DLBCL_3 |
| hsa-miR-18a-5p  | 0.87  | 16.19 | 5.73E-05 | 6.71E-04 | 0.95 | DLBCL_3 |
| hsa-miR-196b-5p | 0.88  | 8.89  | 2.87E-03 | 1.85E-02 | 0.89 | DLBCL_3 |
| hsa-miR-107     | 0.89  | 23.43 | 1.30E-06 | 2.23E-05 | 0.88 | DLBCL_3 |
| hsa-miR-21-5p   | 0.90  | 17.16 | 3.44E-05 | 4.19E-04 | 0.86 | DLBCL_3 |
| hsa-miR-652-3p  | 0.91  | 9.67  | 1.87E-03 | 1.30E-02 | 0.79 | DLBCL_3 |

|                   |      |       |          |          |      |         |
|-------------------|------|-------|----------|----------|------|---------|
| hsa-miR-23a-3p    | 0.93 | 12.15 | 4.90E-04 | 3.99E-03 | 0.79 | DLBCL_3 |
| hsa-miR-301a-3p   | 0.93 | 11.80 | 5.93E-04 | 4.78E-03 | 0.81 | DLBCL_3 |
| hsa-miR-140-5p    | 0.94 | 11.30 | 7.75E-04 | 6.12E-03 | 0.86 | DLBCL_3 |
| hsa-miR-199b-5p   | 0.94 | 8.74  | 3.11E-03 | 1.96E-02 | 0.86 | DLBCL_3 |
| hsa-miR-4286      | 0.97 | 9.11  | 2.54E-03 | 1.66E-02 | 0.79 | DLBCL_3 |
| hsa-miR-500b      | 0.97 | 8.15  | 4.31E-03 | 2.57E-02 | 0.76 | DLBCL_3 |
| hsa-miR-27b-3p    | 0.99 | 13.18 | 2.83E-04 | 2.57E-03 | 0.87 | DLBCL_3 |
| hsa-miR-106a-3p   | 0.99 | 6.94  | 8.42E-03 | 4.45E-02 | 0.43 | DLBCL_3 |
| hsa-miR-195-5p    | 1.00 | 7.37  | 6.65E-03 | 3.57E-02 | 0.68 | DLBCL_3 |
| hsa-miR-23b-3p    | 1.00 | 14.30 | 1.56E-04 | 1.62E-03 | 0.76 | DLBCL_3 |
| hsa-miR-130b-5p   | 1.00 | 10.89 | 9.66E-04 | 7.40E-03 | 0.86 | DLBCL_3 |
| hsa-miR-500a-5p   | 1.01 | 8.74  | 3.11E-03 | 1.96E-02 | 0.78 | DLBCL_3 |
| hsa-miR-363-3p    | 1.03 | 19.57 | 9.67E-06 | 1.34E-04 | 0.99 | DLBCL_3 |
| hsa-miR-99b-5p    | 1.04 | 7.40  | 6.53E-03 | 3.53E-02 | 0.74 | DLBCL_3 |
| hsa-miR-1306-5p   | 1.05 | 9.15  | 2.49E-03 | 1.66E-02 | 0.77 | DLBCL_3 |
| hsa-miR-550a-3-5p | 1.06 | 12.52 | 4.02E-04 | 3.41E-03 | 0.80 | DLBCL_3 |
| hsa-miR-29a-3p    | 1.07 | 15.87 | 6.79E-05 | 7.84E-04 | 0.83 | DLBCL_3 |
| hsa-miR-1307-3p   | 1.07 | 9.39  | 2.18E-03 | 1.49E-02 | 0.77 | DLBCL_3 |
| hsa-miR-3912      | 1.07 | 6.93  | 8.49E-03 | 4.45E-02 | 0.75 | DLBCL_3 |
| hsa-miR-590-5p    | 1.08 | 17.29 | 3.21E-05 | 4.14E-04 | 0.90 | DLBCL_3 |
| hsa-miR-361-3p    | 1.09 | 14.29 | 1.57E-04 | 1.62E-03 | 0.87 | DLBCL_3 |
| hsa-miR-183-3p    | 1.09 | 12.95 | 3.19E-04 | 2.84E-03 | 0.69 | DLBCL_3 |
| hsa-miR-17-3p     | 1.10 | 22.49 | 2.11E-06 | 3.34E-05 | 0.99 | DLBCL_3 |
| hsa-miR-550a-5p   | 1.10 | 13.83 | 2.00E-04 | 1.93E-03 | 0.80 | DLBCL_3 |
| hsa-miR-378a-5p   | 1.13 | 11.23 | 8.06E-04 | 6.29E-03 | 0.81 | DLBCL_3 |
| hsa-miR-93-5p     | 1.15 | 20.96 | 4.68E-06 | 6.96E-05 | 0.86 | DLBCL_3 |
| hsa-miR-185-5p    | 1.16 | 26.29 | 2.94E-07 | 5.68E-06 | 0.90 | DLBCL_3 |
| hsa-miR-150-3p    | 1.17 | 9.16  | 2.48E-03 | 1.66E-02 | 0.79 | DLBCL_3 |
| hsa-miR-126-3p    | 1.19 | 21.61 | 3.33E-06 | 5.15E-05 | 0.90 | DLBCL_3 |
| hsa-miR-3179      | 1.22 | 7.93  | 4.86E-03 | 2.82E-02 | 0.79 | DLBCL_3 |
| hsa-miR-20b-5p    | 1.22 | 26.31 | 2.90E-07 | 5.68E-06 | 0.99 | DLBCL_3 |
| hsa-miR-660-3p    | 1.24 | 17.14 | 3.47E-05 | 4.19E-04 | 0.84 | DLBCL_3 |
| hsa-miR-92b-5p    | 1.24 | 9.10  | 2.56E-03 | 1.66E-02 | 0.82 | DLBCL_3 |
| hsa-miR-7-1-3p    | 1.25 | 14.95 | 1.10E-04 | 1.20E-03 | 0.89 | DLBCL_3 |
| hsa-miR-326       | 1.26 | 15.78 | 7.10E-05 | 8.07E-04 | 0.83 | DLBCL_3 |
| hsa-miR-340-3p    | 1.27 | 13.39 | 2.52E-04 | 2.35E-03 | 0.84 | DLBCL_3 |
| hsa-miR-769-5p    | 1.28 | 12.37 | 4.37E-04 | 3.63E-03 | 0.82 | DLBCL_3 |
| hsa-miR-3158-3p   | 1.31 | 9.83  | 1.72E-03 | 1.21E-02 | 0.75 | DLBCL_3 |
| hsa-miR-576-3p    | 1.31 | 8.23  | 4.13E-03 | 2.49E-02 | 0.79 | DLBCL_3 |
| hsa-miR-186-5p    | 1.32 | 19.58 | 9.65E-06 | 1.34E-04 | 0.76 | DLBCL_3 |
| hsa-miR-1249      | 1.32 | 8.12  | 4.37E-03 | 2.58E-02 | 0.75 | DLBCL_3 |
| hsa-miR-598       | 1.32 | 16.48 | 4.91E-05 | 5.84E-04 | 0.91 | DLBCL_3 |
| hsa-miR-192-3p    | 1.33 | 13.51 | 2.38E-04 | 2.27E-03 | 0.79 | DLBCL_3 |
| hsa-miR-103a-3p   | 1.34 | 74.04 | 7.65E-18 | 1.97E-15 | 0.98 | DLBCL_3 |
| hsa-miR-941       | 1.35 | 10.37 | 1.28E-03 | 9.38E-03 | 0.84 | DLBCL_3 |
| hsa-miR-551b-3p   | 1.35 | 10.53 | 1.17E-03 | 8.72E-03 | 0.66 | DLBCL_3 |
| hsa-miR-26a-5p    | 1.35 | 38.87 | 4.53E-10 | 1.67E-08 | 1.00 | DLBCL_3 |
| hsa-miR-221-5p    | 1.37 | 14.13 | 1.71E-04 | 1.74E-03 | 0.80 | DLBCL_3 |
| hsa-miR-181a-3p   | 1.38 | 7.54  | 6.04E-03 | 3.34E-02 | 0.82 | DLBCL_3 |
| hsa-miR-188-5p    | 1.39 | 17.69 | 2.60E-05 | 3.47E-04 | 0.82 | DLBCL_3 |
| hsa-miR-330-5p    | 1.41 | 13.94 | 1.89E-04 | 1.87E-03 | 0.90 | DLBCL_3 |

|                 |      |       |          |          |      |         |
|-----------------|------|-------|----------|----------|------|---------|
| hsa-miR-4746-5p | 1.41 | 7.08  | 7.78E-03 | 4.15E-02 | 0.67 | DLBCL_3 |
| hsa-miR-625-5p  | 1.42 | 31.62 | 1.87E-08 | 5.17E-07 | 0.99 | DLBCL_3 |
| hsa-miR-148b-5p | 1.42 | 26.85 | 2.20E-07 | 4.73E-06 | 0.87 | DLBCL_3 |
| hsa-miR-222-3p  | 1.45 | 33.19 | 8.35E-09 | 2.48E-07 | 0.95 | DLBCL_3 |
| hsa-miR-1227    | 1.46 | 6.92  | 8.51E-03 | 4.45E-02 | 0.66 | DLBCL_3 |
| hsa-miR-30d-5p  | 1.46 | 27.73 | 1.39E-07 | 3.26E-06 | 0.84 | DLBCL_3 |
| hsa-miR-652-5p  | 1.46 | 21.30 | 3.93E-06 | 5.96E-05 | 0.91 | DLBCL_3 |
| hsa-miR-421     | 1.47 | 28.18 | 1.11E-07 | 2.67E-06 | 0.93 | DLBCL_3 |
| hsa-miR-324-5p  | 1.50 | 25.13 | 5.36E-07 | 9.63E-06 | 0.86 | DLBCL_3 |
| hsa-miR-125b-5p | 1.52 | 13.16 | 2.87E-04 | 2.58E-03 | 0.80 | DLBCL_3 |
| hsa-miR-20a-3p  | 1.53 | 17.22 | 3.33E-05 | 4.19E-04 | 0.83 | DLBCL_3 |
| hsa-miR-501-5p  | 1.55 | 23.44 | 1.29E-06 | 2.23E-05 | 0.96 | DLBCL_3 |
| hsa-miR-425-5p  | 1.55 | 48.44 | 3.40E-12 | 1.75E-10 | 0.94 | DLBCL_3 |
| hsa-miR-3667-5p | 1.58 | 13.33 | 2.61E-04 | 2.41E-03 | 0.76 | DLBCL_3 |
| hsa-miR-192-5p  | 1.58 | 56.37 | 6.00E-14 | 4.64E-12 | 0.99 | DLBCL_3 |
| hsa-miR-185-3p  | 1.59 | 22.65 | 1.94E-06 | 3.12E-05 | 0.90 | DLBCL_3 |
| hsa-miR-3130-5p | 1.60 | 19.67 | 9.21E-06 | 1.32E-04 | 0.80 | DLBCL_3 |
| hsa-miR-339-5p  | 1.61 | 26.11 | 3.23E-07 | 6.08E-06 | 0.84 | DLBCL_3 |
| hsa-miR-641     | 1.61 | 12.81 | 3.44E-04 | 2.99E-03 | 0.77 | DLBCL_3 |
| hsa-miR-503     | 1.61 | 33.57 | 6.88E-09 | 2.13E-07 | 0.96 | DLBCL_3 |
| hsa-miR-33a-3p  | 1.65 | 17.15 | 3.45E-05 | 4.19E-04 | 0.94 | DLBCL_3 |
| hsa-miR-99a-5p  | 1.65 | 23.16 | 1.49E-06 | 2.50E-05 | 0.87 | DLBCL_3 |
| hsa-miR-500a-3p | 1.65 | 39.92 | 2.64E-10 | 1.04E-08 | 0.92 | DLBCL_3 |
| hsa-miR-210     | 1.66 | 53.32 | 2.83E-13 | 1.99E-11 | 0.88 | DLBCL_3 |
| hsa-miR-589-3p  | 1.66 | 20.47 | 6.07E-06 | 8.85E-05 | 0.94 | DLBCL_3 |
| hsa-miR-502-3p  | 1.67 | 45.13 | 1.85E-11 | 8.40E-10 | 0.96 | DLBCL_3 |
| hsa-miR-1307-5p | 1.69 | 15.71 | 7.38E-05 | 8.26E-04 | 0.80 | DLBCL_3 |
| hsa-miR-215     | 1.70 | 14.71 | 1.26E-04 | 1.33E-03 | 0.99 | DLBCL_3 |
| hsa-miR-378i    | 1.71 | 30.83 | 2.81E-08 | 7.50E-07 | 0.92 | DLBCL_3 |
| hsa-miR-181b-5p | 1.74 | 38.32 | 5.99E-10 | 2.01E-08 | 0.94 | DLBCL_3 |
| hsa-miR-29c-5p  | 1.76 | 48.93 | 2.65E-12 | 1.46E-10 | 0.98 | DLBCL_3 |
| hsa-miR-3922-5p | 1.76 | 9.20  | 2.41E-03 | 1.64E-02 | 0.67 | DLBCL_3 |
| hsa-miR-30a-5p  | 1.76 | 8.83  | 2.96E-03 | 1.89E-02 | 0.51 | DLBCL_3 |
| hsa-miR-378a-3p | 1.77 | 45.62 | 1.44E-11 | 6.94E-10 | 0.99 | DLBCL_3 |
| hsa-miR-502-5p  | 1.82 | 26.39 | 2.79E-07 | 5.68E-06 | 0.96 | DLBCL_3 |
| hsa-miR-151a-3p | 1.84 | 32.77 | 1.04E-08 | 2.97E-07 | 0.93 | DLBCL_3 |
| hsa-miR-194-5p  | 1.84 | 50.88 | 9.84E-13 | 5.85E-11 | 0.96 | DLBCL_3 |
| hsa-miR-29b-3p  | 1.84 | 28.73 | 8.33E-08 | 2.08E-06 | 0.95 | DLBCL_3 |
| hsa-miR-1537    | 1.90 | 12.47 | 4.13E-04 | 3.47E-03 | 0.86 | DLBCL_3 |
| hsa-miR-3074-3p | 1.96 | 10.36 | 1.29E-03 | 9.38E-03 | 0.77 | DLBCL_3 |
| hsa-miR-3117-3p | 1.98 | 10.14 | 1.45E-03 | 1.05E-02 | 0.32 | DLBCL_3 |
| hsa-miR-296-5p  | 2.15 | 27.60 | 1.49E-07 | 3.29E-06 | 0.95 | DLBCL_3 |
| hsa-miR-140-3p  | 2.16 | 56.65 | 5.19E-14 | 4.64E-12 | 0.96 | DLBCL_3 |
| hsa-miR-2278    | 2.17 | 23.06 | 1.57E-06 | 2.58E-05 | 0.89 | DLBCL_3 |
| hsa-miR-3176    | 2.21 | 7.54  | 6.02E-03 | 3.34E-02 | 0.77 | DLBCL_3 |
| hsa-miR-100-5p  | 2.23 | 15.50 | 8.25E-05 | 9.11E-04 | 0.78 | DLBCL_3 |
| hsa-miR-3688-3p | 2.24 | 10.83 | 1.00E-03 | 7.58E-03 | 0.80 | DLBCL_3 |
| hsa-miR-4690-3p | 2.25 | 18.03 | 2.18E-05 | 2.95E-04 | 0.73 | DLBCL_3 |
| hsa-miR-3909    | 2.27 | 56.87 | 4.65E-14 | 4.64E-12 | 0.98 | DLBCL_3 |
| hsa-miR-188-3p  | 2.31 | 13.48 | 2.41E-04 | 2.28E-03 | 0.79 | DLBCL_3 |
| hsa-miR-4714-3p | 2.36 | 26.03 | 3.36E-07 | 6.18E-06 | 0.83 | DLBCL_3 |



|                |      |        |          |          |      |         |
|----------------|------|--------|----------|----------|------|---------|
| hsa-miR-378d   | 2.38 | 56.47  | 5.72E-14 | 4.64E-12 | 0.98 | DLBCL_3 |
| hsa-miR-362-5p | 2.51 | 39.88  | 2.70E-10 | 1.04E-08 | 0.96 | DLBCL_3 |
| hsa-miR-378c   | 2.64 | 110.40 | 7.99E-26 | 3.09E-23 | 1.00 | DLBCL_3 |
| hsa-miR-1273c  | 2.65 | 38.57  | 5.27E-10 | 1.85E-08 | 0.92 | DLBCL_3 |
| hsa-miR-4454   | 2.72 | 50.95  | 9.45E-13 | 5.85E-11 | 0.91 | DLBCL_3 |
| hsa-miR-378f   | 2.83 | 33.95  | 5.66E-09 | 1.82E-07 | 0.83 | DLBCL_3 |
| hsa-miR-29c-3p | 2.94 | 59.42  | 1.27E-14 | 1.97E-12 | 0.97 | DLBCL_3 |
| hsa-miR-4785   | 3.94 | 56.91  | 4.56E-14 | 4.64E-12 | 0.93 | DLBCL_3 |
| hsa-miR-124-3p | 4.96 | 28.76  | 8.20E-08 | 2.08E-06 | 0.75 | DLBCL_3 |
| hsa-miR-34a-5p | 5.35 | 132.02 | 1.48E-30 | 1.14E-27 | 0.97 | DLBCL_3 |

| Supplementary Table S3. Pathways influenced by 20 common dysregulated miRNAs in whole blood samples. |          |        |         |
|------------------------------------------------------------------------------------------------------|----------|--------|---------|
| KEGG pathway                                                                                         | p-value  | #genes | #miRNAs |
| Adherens junction                                                                                    | 1.91E-16 | 34     | 15      |
| Cell cycle                                                                                           | 1.12E-07 | 46     | 16      |
| Proteoglycans in cancer                                                                              | 1.52E-06 | 50     | 15      |
| Bacterial invasion of epithelial cells                                                               | 2.34E-06 | 27     | 11      |
| Bladder cancer                                                                                       | 3.94E-06 | 21     | 14      |
| Shigellosis                                                                                          | 7.40E-06 | 26     | 12      |
| Regulation of actin cytoskeleton                                                                     | 1.75E-05 | 56     | 15      |
| Long-term depression                                                                                 | 7.03E-05 | 17     | 13      |
| p53 signaling pathway                                                                                | 8.13E-05 | 26     | 14      |
| Glioma                                                                                               | 8.13E-05 | 22     | 14      |
| Hepatitis B                                                                                          | 1.77E-04 | 38     | 15      |
| Oocyte meiosis                                                                                       | 3.18E-04 | 29     | 16      |
| Colorectal cancer                                                                                    | 4.23E-04 | 22     | 13      |
| Melanoma                                                                                             | 4.23E-04 | 22     | 14      |
| Chronic myeloid leukemia                                                                             | 4.23E-04 | 23     | 14      |
| Pancreatic cancer                                                                                    | 6.18E-04 | 24     | 14      |
| Lysine degradation                                                                                   | 9.78E-04 | 14     | 9       |
| Prostate cancer                                                                                      | 1.63E-03 | 29     | 14      |
| Viral carcinogenesis                                                                                 | 2.13E-03 | 42     | 14      |
| FoxO signaling pathway                                                                               | 2.13E-03 | 39     | 16      |
| TGF-beta signaling pathway                                                                           | 2.14E-03 | 25     | 13      |
| Sphingolipid signaling pathway                                                                       | 2.94E-03 | 33     | 14      |
| Salmonella infection                                                                                 | 3.54E-03 | 26     | 15      |
| Biotin metabolism                                                                                    | 4.74E-03 | 1      | 2       |
| Endometrial cancer                                                                                   | 6.21E-03 | 16     | 14      |
| Pathways in cancer                                                                                   | 6.86E-03 | 79     | 14      |
| Hippo signaling pathway                                                                              | 7.65E-03 | 38     | 14      |
| Focal adhesion                                                                                       | 9.28E-03 | 51     | 15      |
| Non-small cell lung cancer                                                                           | 1.72E-02 | 17     | 14      |
| HTLV-I infection                                                                                     | 2.20E-02 | 60     | 15      |
| Axon guidance                                                                                        | 2.35E-02 | 27     | 15      |

|                                             |          |    |    |
|---------------------------------------------|----------|----|----|
| Protein processing in endoplasmic reticulum | 2.93E-02 | 39 | 15 |
| MAPK signaling pathway                      | 3.27E-02 | 53 | 16 |
| Thyroid cancer                              | 3.87E-02 | 9  | 13 |
| ErbB signaling pathw                        | 4.66E-02 | 25 | 14 |

Supplementary Figure 1. Contribution of variables to each sPLS-DA component in c-miRNAs. The bars are coloured according to outcome for which variable has a maximal median value.

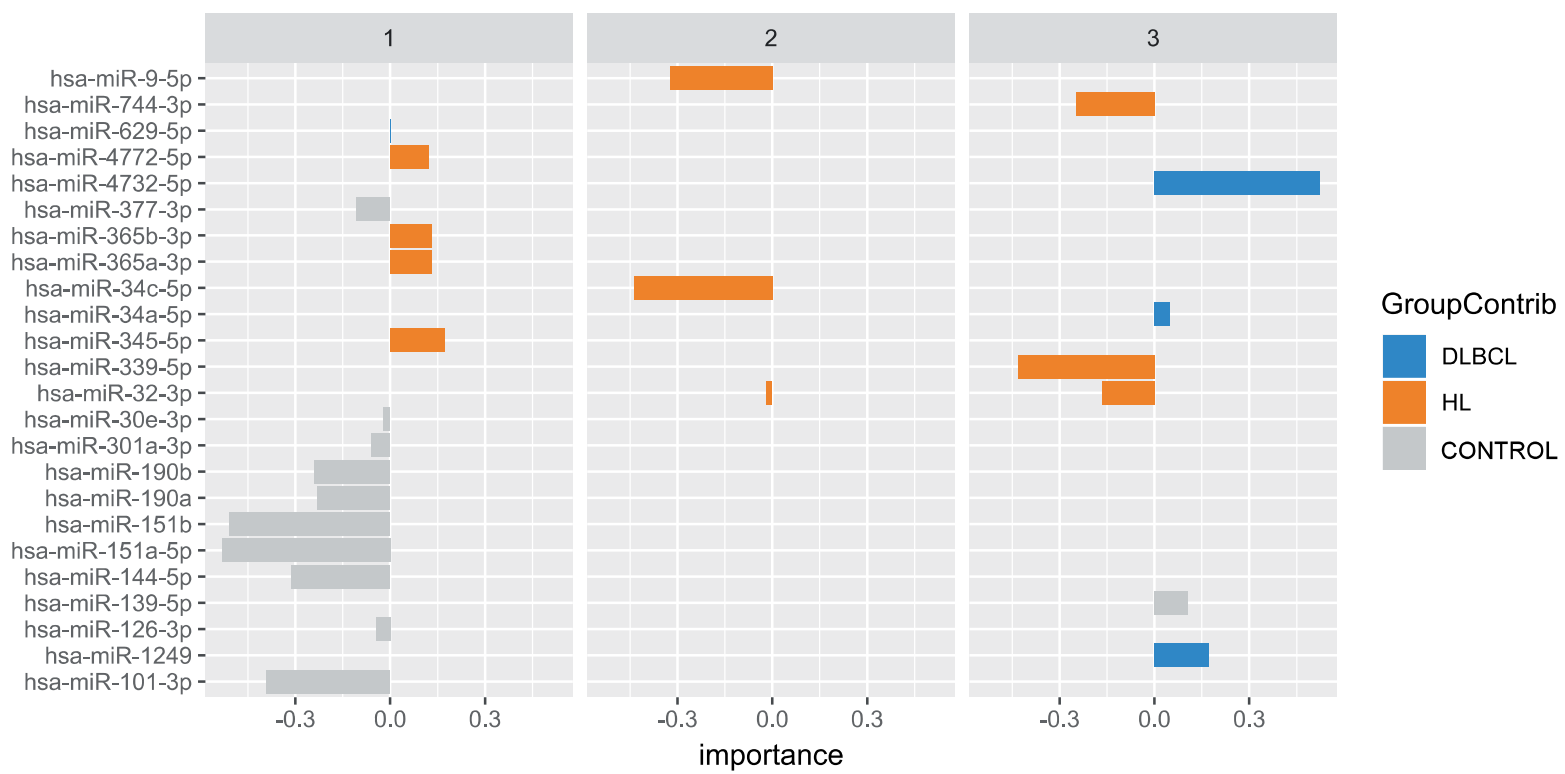

Supplementary Figure 2. Contribution of variables to each sPLS-DA component in wb-miRNAs. The bars are coloured according to outcome for which variable has a maximal median value.

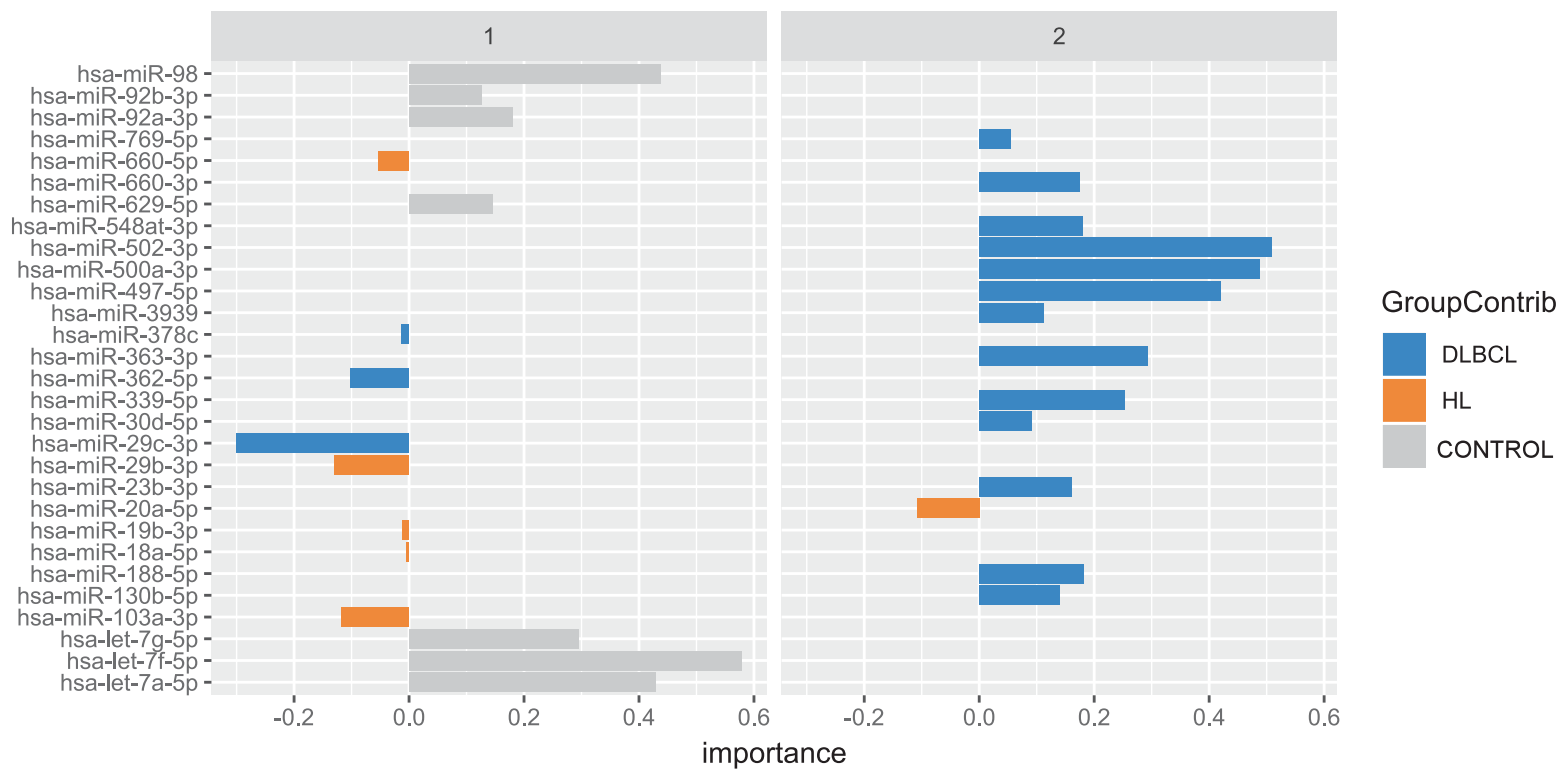

Supplement: f1 [file 3212878.f1.pdf]
